# Supplementary material for: Novel 8-Substituted Coumarins That Selectively Inhibit Human Carbonic Anhydrase IX and XII
Source: PubMed Central journal article supplement (PMC6429297; doi:10.3390/ijms20051208), 2019-03-10

# Supporting Information

## Novel 8-Substituted Coumarins That Selectively Inhibit Human Carbonic Anhydrase IX and XII

Kerem Buran, Silvia Bua, Giulio Poli, F. Esra Önen Bayram, Tiziano Tuccinardi, Claudiu T. Supuran

### Table of Contents

|                                                                                                     |        |
|-----------------------------------------------------------------------------------------------------|--------|
| <b>Table S1.</b> Yields obtained for compounds 2- 13                                                | S2     |
| <b>Figure S1.</b> Alignment between <i>hCA I</i> , <i>hCA II</i> , <i>hCA IX</i> and <i>hCA XII</i> | S3     |
| NMR spectra of final compounds.                                                                     | S4-S28 |

**Table S1.** Yields obtained for compounds **2- 13**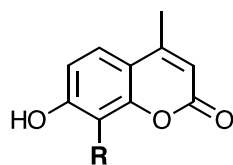

|           | <b>R Groups</b> | <b>% Yield</b> |
|-----------|-----------------|----------------|
| <b>2</b>  |                 | 63             |
| <b>3</b>  |                 | 32             |
| <b>4</b>  |                 | 47             |
| <b>5</b>  |                 | 26             |
| <b>6</b>  |                 | 50             |
| <b>7</b>  |                 | 53             |
| <b>8</b>  |                 | 64             |
| <b>9</b>  |                 | 67             |
| <b>10</b> |                 | 50             |
| <b>11</b> |                 | 60             |
| <b>12</b> |                 | 76             |
| <b>13</b> |                 | 60             |

```

CAI      -----
CAII     -----
CAXII    -----
CAIX     MAPLCPSPWLPPLLI PAPAPGLTVQLLSLLLLLVFVHPQRLPRMQEDSPLG

CAI      -----
CAII     -----
CAXII    -----MP
CAIX     GGSSGEDDPLGEEDLPSEEDSPREEDPPGEEDLPGEEDLPGEEDLPEVKP

CAI      -----MASPDWGYDDKNGPEQWS
CAII     -----MSHHWGYGKHNGPEHWH
CAXII    RRS LHAAAVLLLVLKEQPSSPAP-----VNGSKWTFYFGPDGENSW
CAIX     KSEEEGSLKLEDLPTVEAPGDPQEPQNNNAHRDKEGDDQSHWRYGGDPPWP

CAI      KLYPIANGNNQSPVDIKTSETKHDTSLKPI SVS-YNPATAKEI INVGH
CAII     KDFPIAKGERQSPVDIDHTHTAKYDPSLKPLSVS-YDQATSLRILNNGHAF
CAXII    KKYPCSGLLQSPIDLHSDILQYDASLTPLFQGYNLSANKQFLLTNNGH
CAIX     RVSPACAGRFQSPVDIRPQLAAFCPALRPLELLGFQLPPLPELRLRNNGH

CAI      HVNFEDNDNRSVLKGGPFSDSYRLFQFHFHWGSTNE-HGSEHTVDGVKYS
CAII     NVEFDDSQDKAVLKGGLDGTYRLIQFHFHWGSLDG-QGSEHTVDKPKYA
CAXII    SVKLNLPSDMHIQG---LQSRYSATQLHLHWGNPNDPHGSEHTVSGQHFA
CAIX     SVQLTLPPGLEMALG--PGREYRALQLHLHWGAAGR-PGSEHTVEGHRFP

CAI      AELHVAHWNSAKYSSLAEAASKADGLAVIGVLMKVG-EANPKLQKVLDAL
CAII     AELHLVHWN-TKYGDFGKAVQPDGLAVLGI FLKVG-SAKPGLQKVVDVL
CAXII    AELHIVHYNLDLPDASTASNKSEGLAVLAVLIE MG-SFNPSYDKIFSHL
CAIX     AEIHVVHLS-TAFARVDEALGRPGGLAVLAAFLEE GPEENSAYEQLLSRL

CAI      QAIKTKKRAPFTNFD PSTLLPS-SLDFWTFYPGSLTHPPLYESVTWICK
CAII     DSIKTKGKSADFTNFDPRGLLPE-SLDYWTFYPGSLTTPPLLECVTWIVLK
CAXII    QHVVKYKQEA FVPGFNIEELLPERTAEYYRYRGS LTPPCNPTVLWTVFR
CAIX     EEIAEEGSETQVPGLDISALLPSDFSR YFQYEGSLTTPPCAQGVWTVFN

CAI      ESISVSSEQLAQFRSLLSNVEGDNAV--PMQHNNRPTQPLKGRTVRAS
CAII     EPI SVSSEQVLKFRKLNFNGE GEP EE--LMVDNWRPAQPLKNRQIKAS
CAIX     NPVQISQEQLLALETALYCTHMDDPSPREMINNFRQVQKFDERLVYTS
CAIX     QTVMLSAKQLHTLSDTLWG-----PGDSRLQLNFRATQPLNGRVIEAS

CAI      -----
CAII     -----
CAXII    Q-VQVCTAAGLSLGIILSLALAGILGICI-----VVVSIWLFRRKSIK
CAIX     AGVDSSPRAAEFVQLNSCLAAGDILALVFGLLFAVTSVAFLVQMRQHR

CAI      -----
CAII     -----
CAXII    GDNKGV IYK PATKMETEAHA
CAIX     GTKGGVS YRPAEVAETGA--

```

**Figure S1.** Alignment between *hCA I*, *hCA II*, *hCA IX* and *hCA XII*. Conserved residues are reported in bold.

**Compound 1**  
 **$^1\text{H}$  NMR**

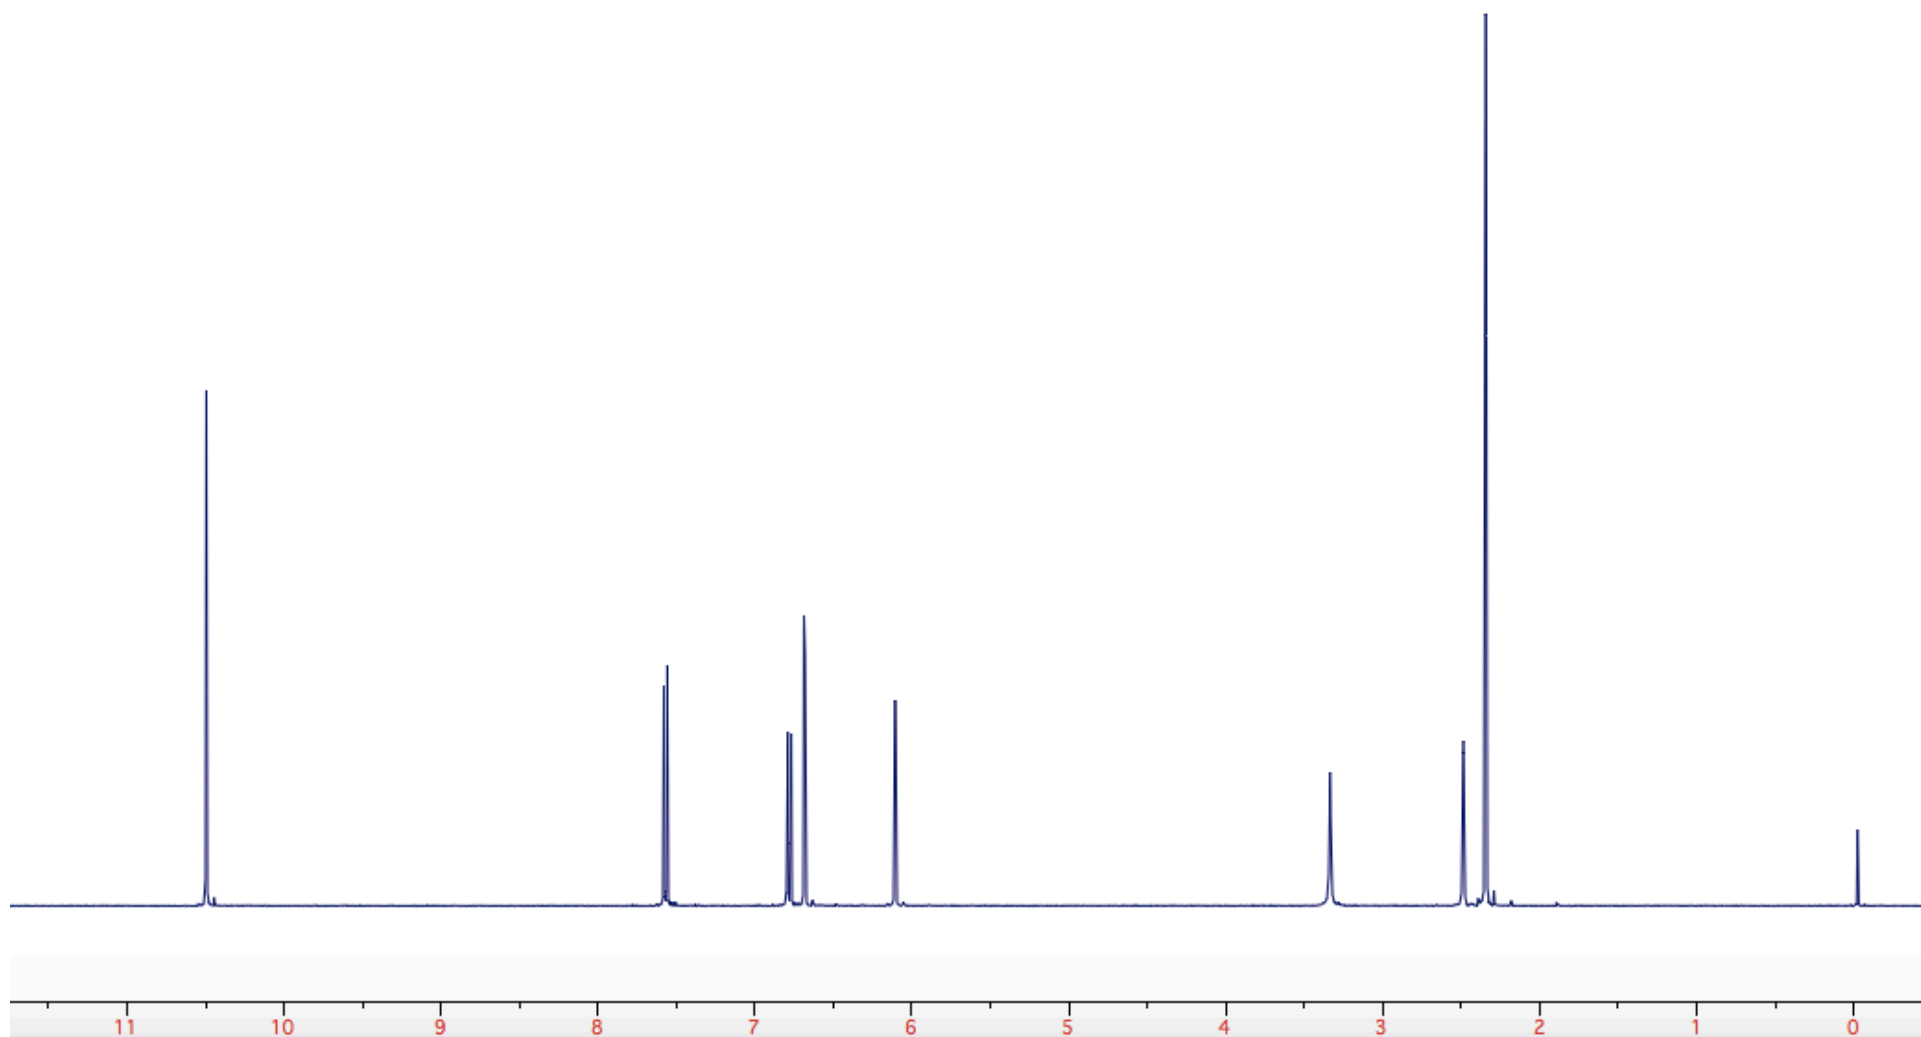

# Compound 1

## <sup>13</sup>C NMR

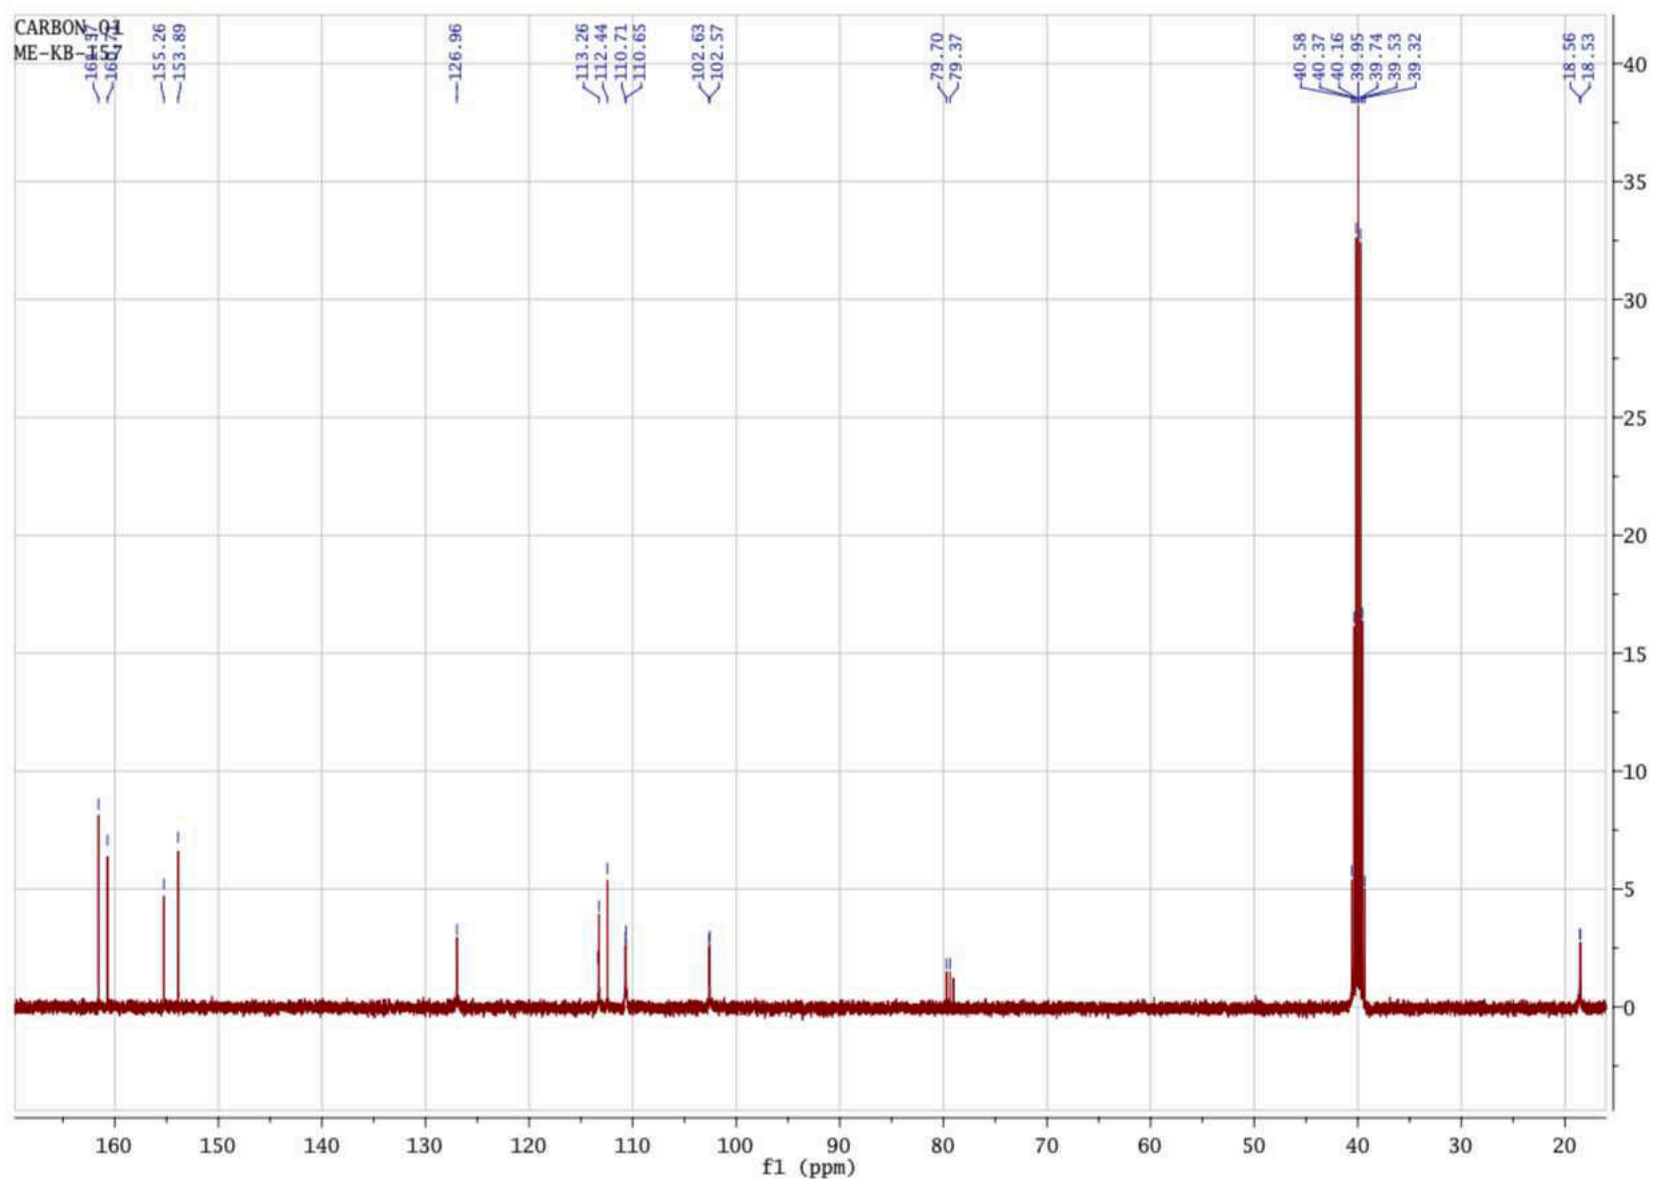

# Compound 2

## <sup>1</sup>H NMR

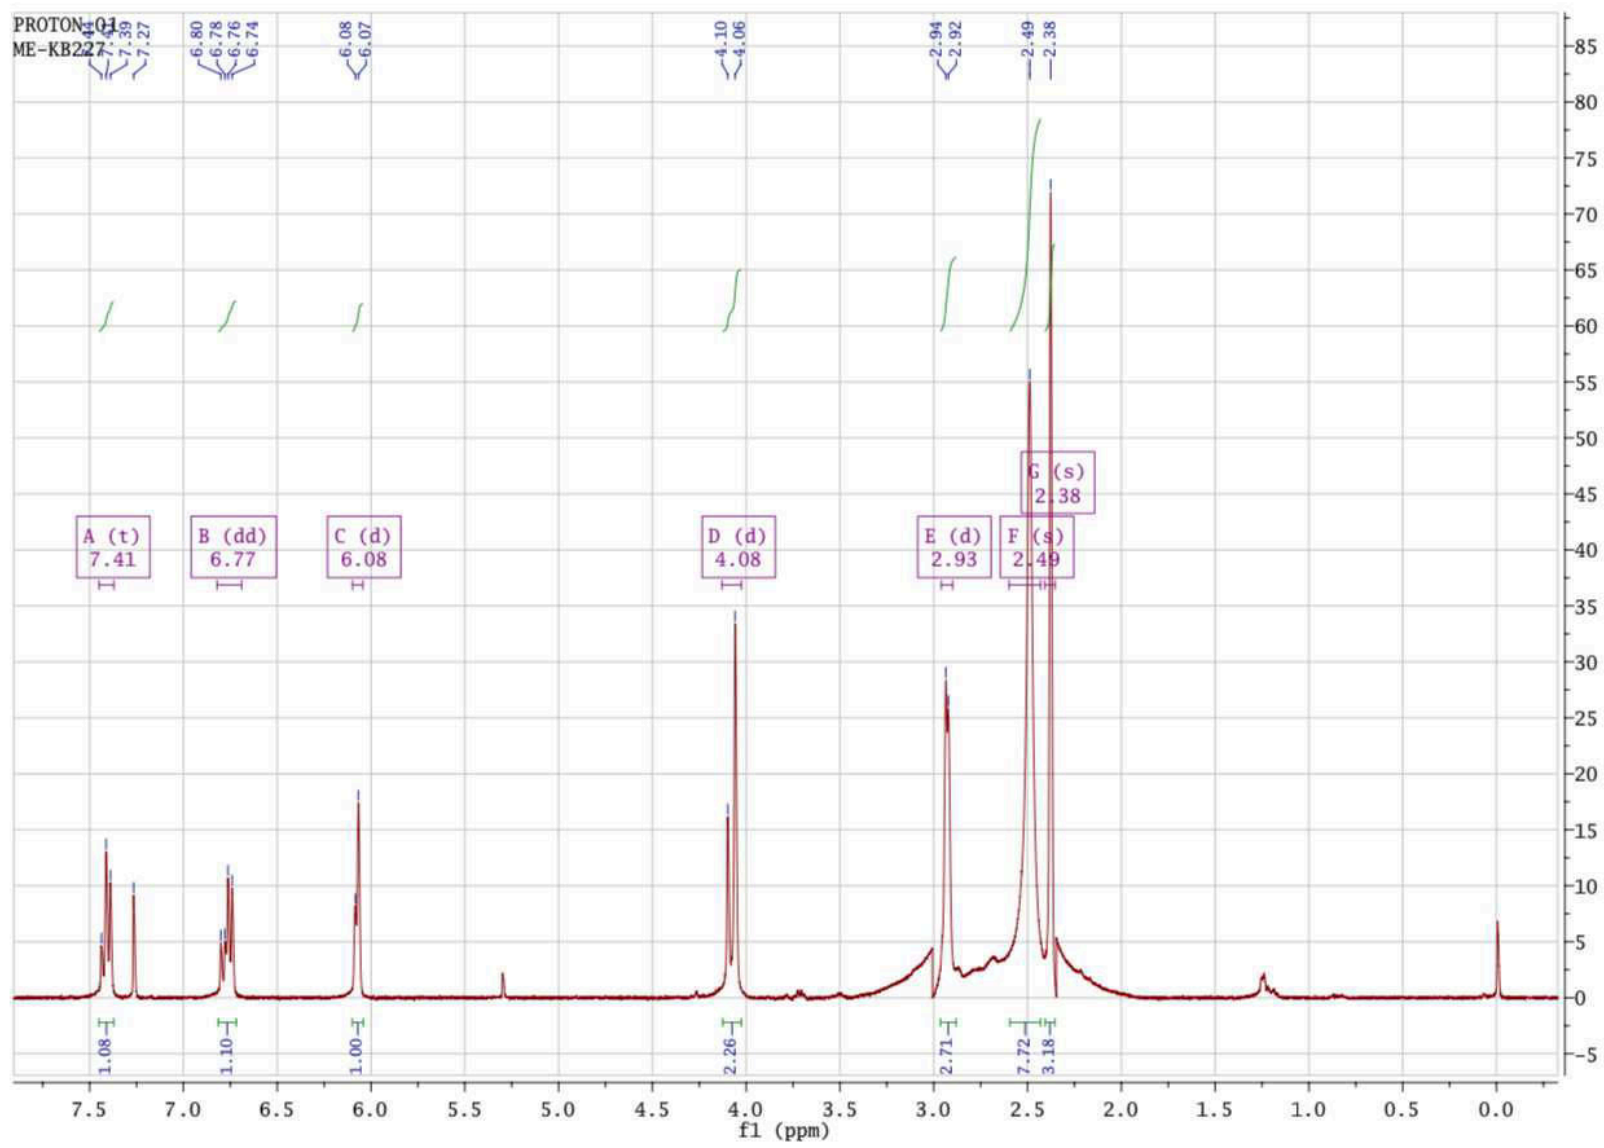

# Compound 2

## <sup>13</sup>C NMR

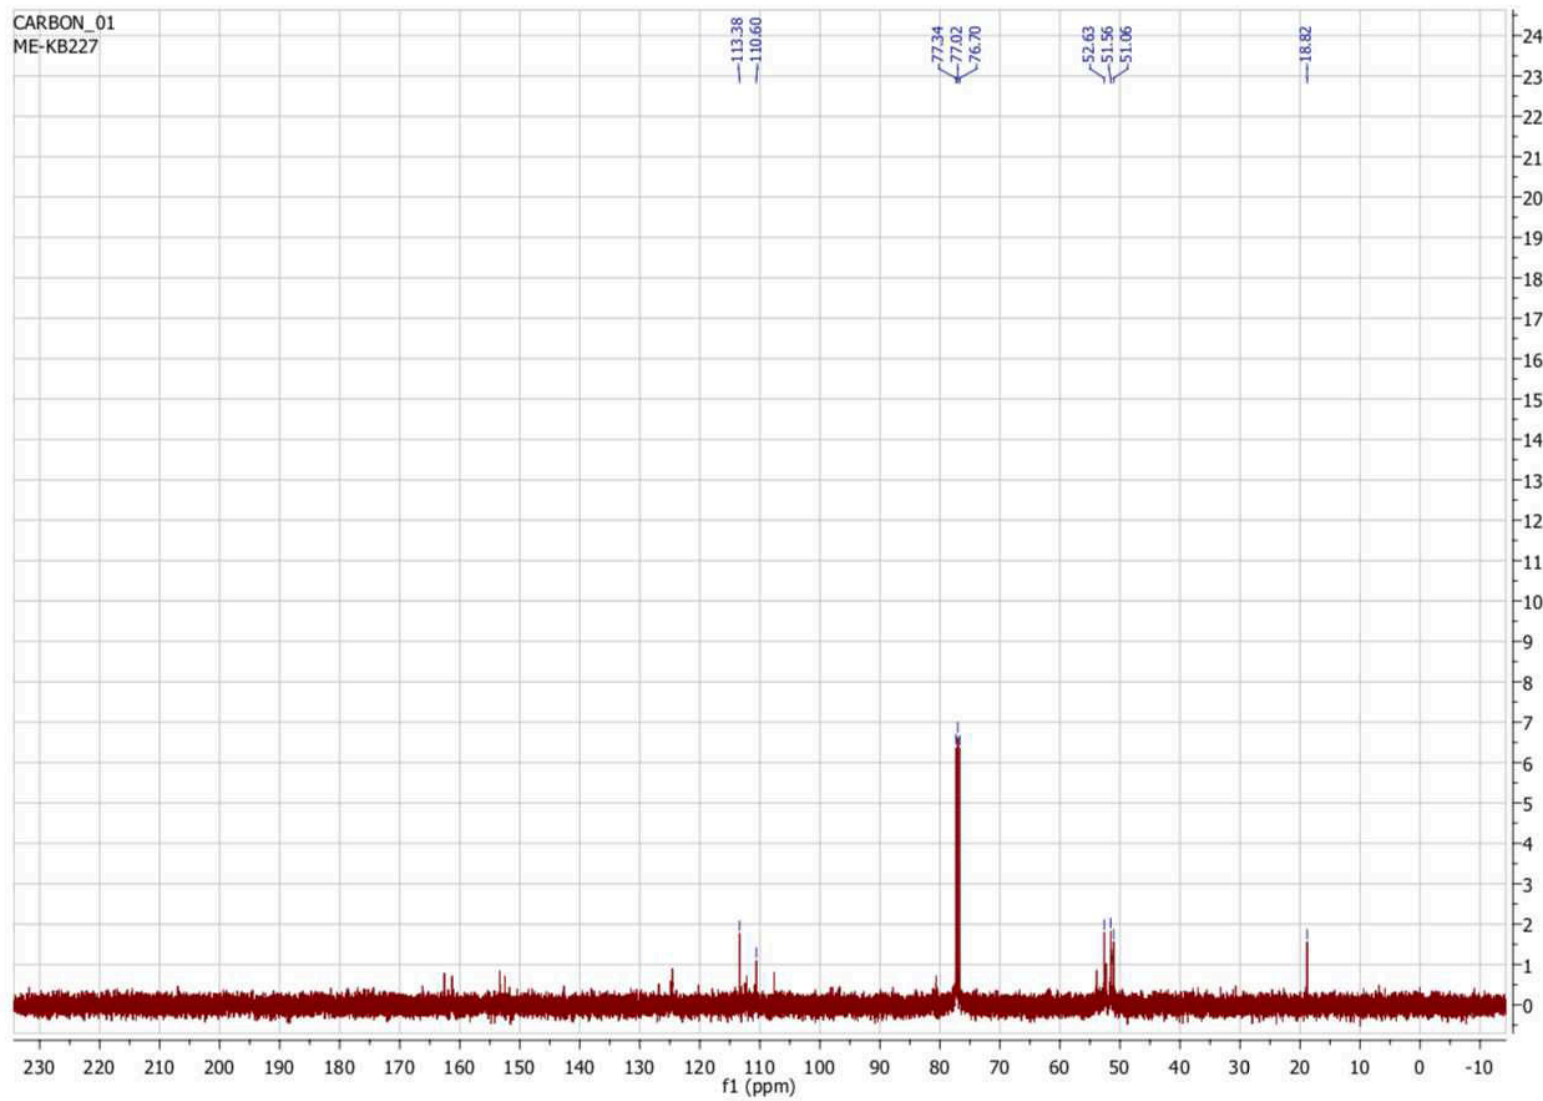

**Compound 3**  
 **$^1\text{H}$  NMR**

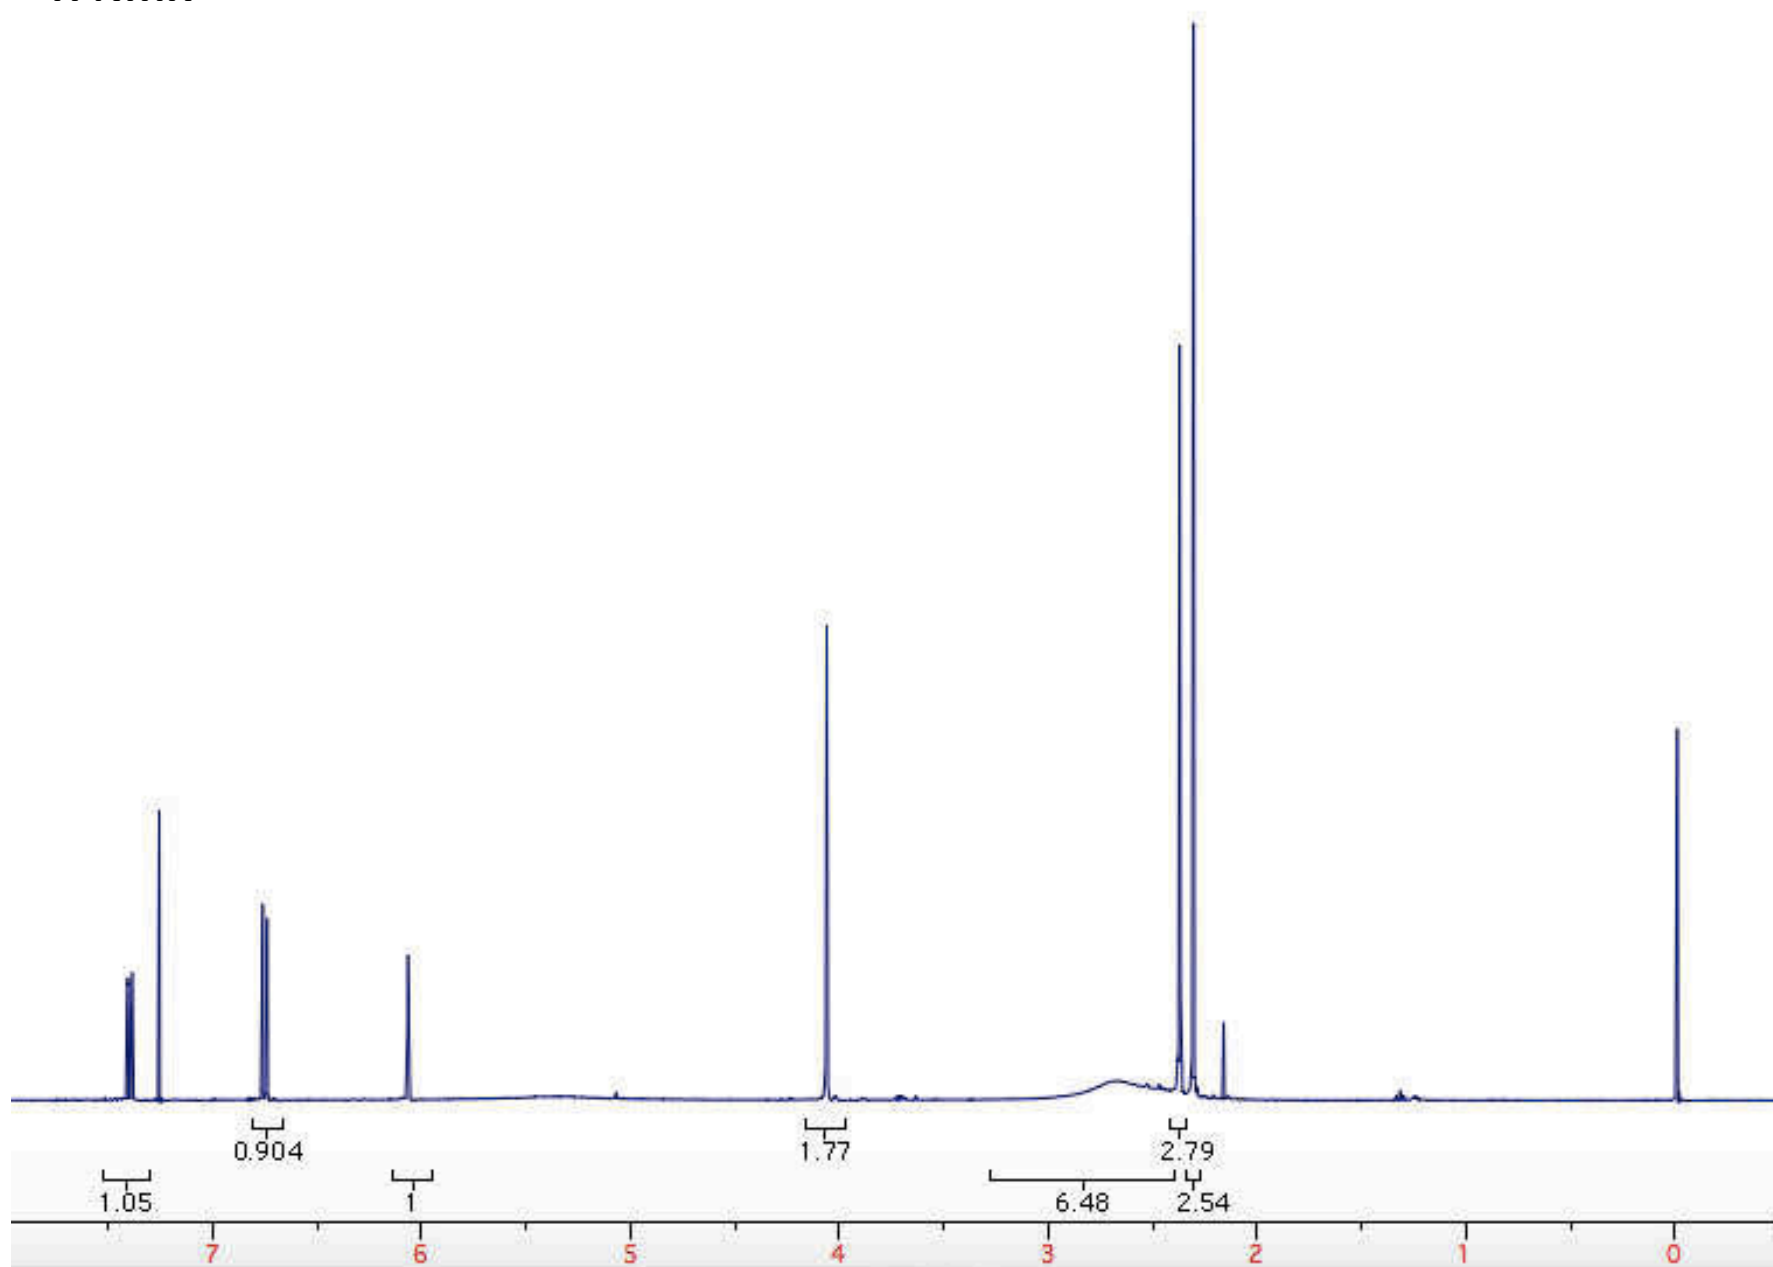



# Compound 3

## <sup>13</sup>C NMR

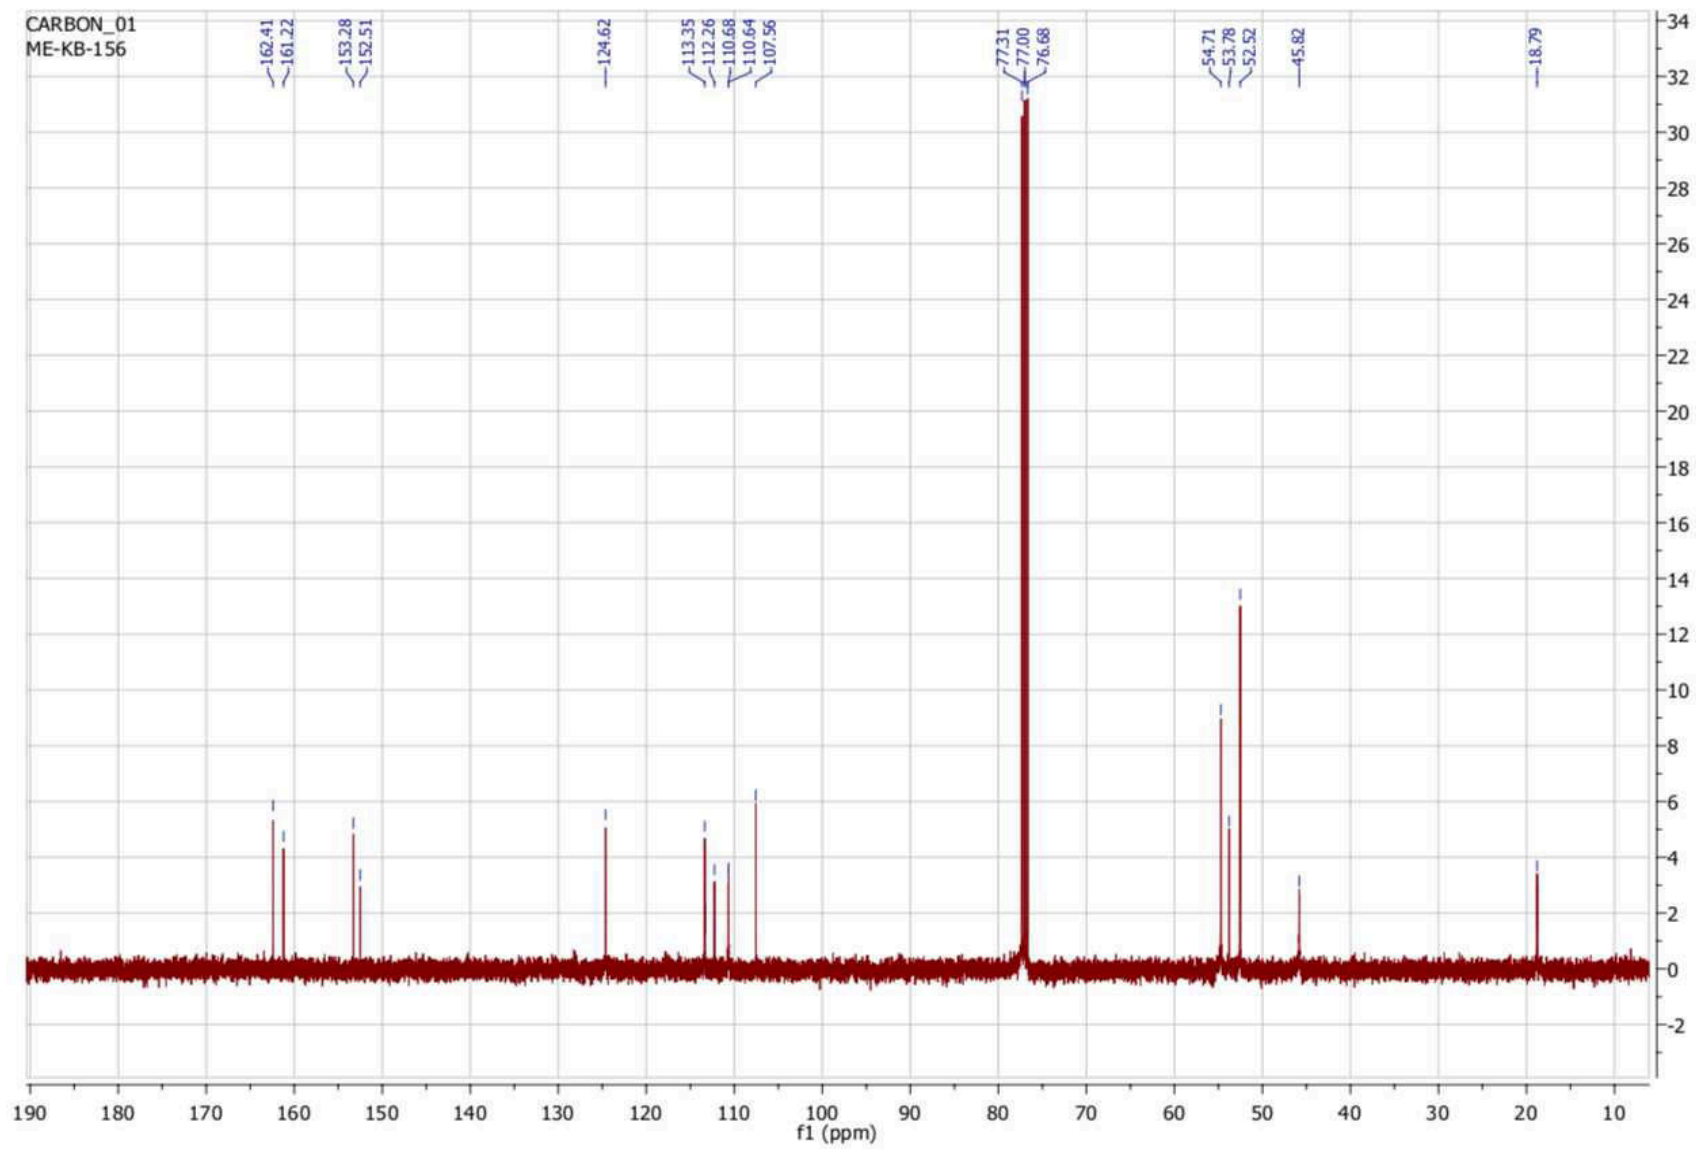

**Compound 4**  
 **$^1\text{H}$  NMR**

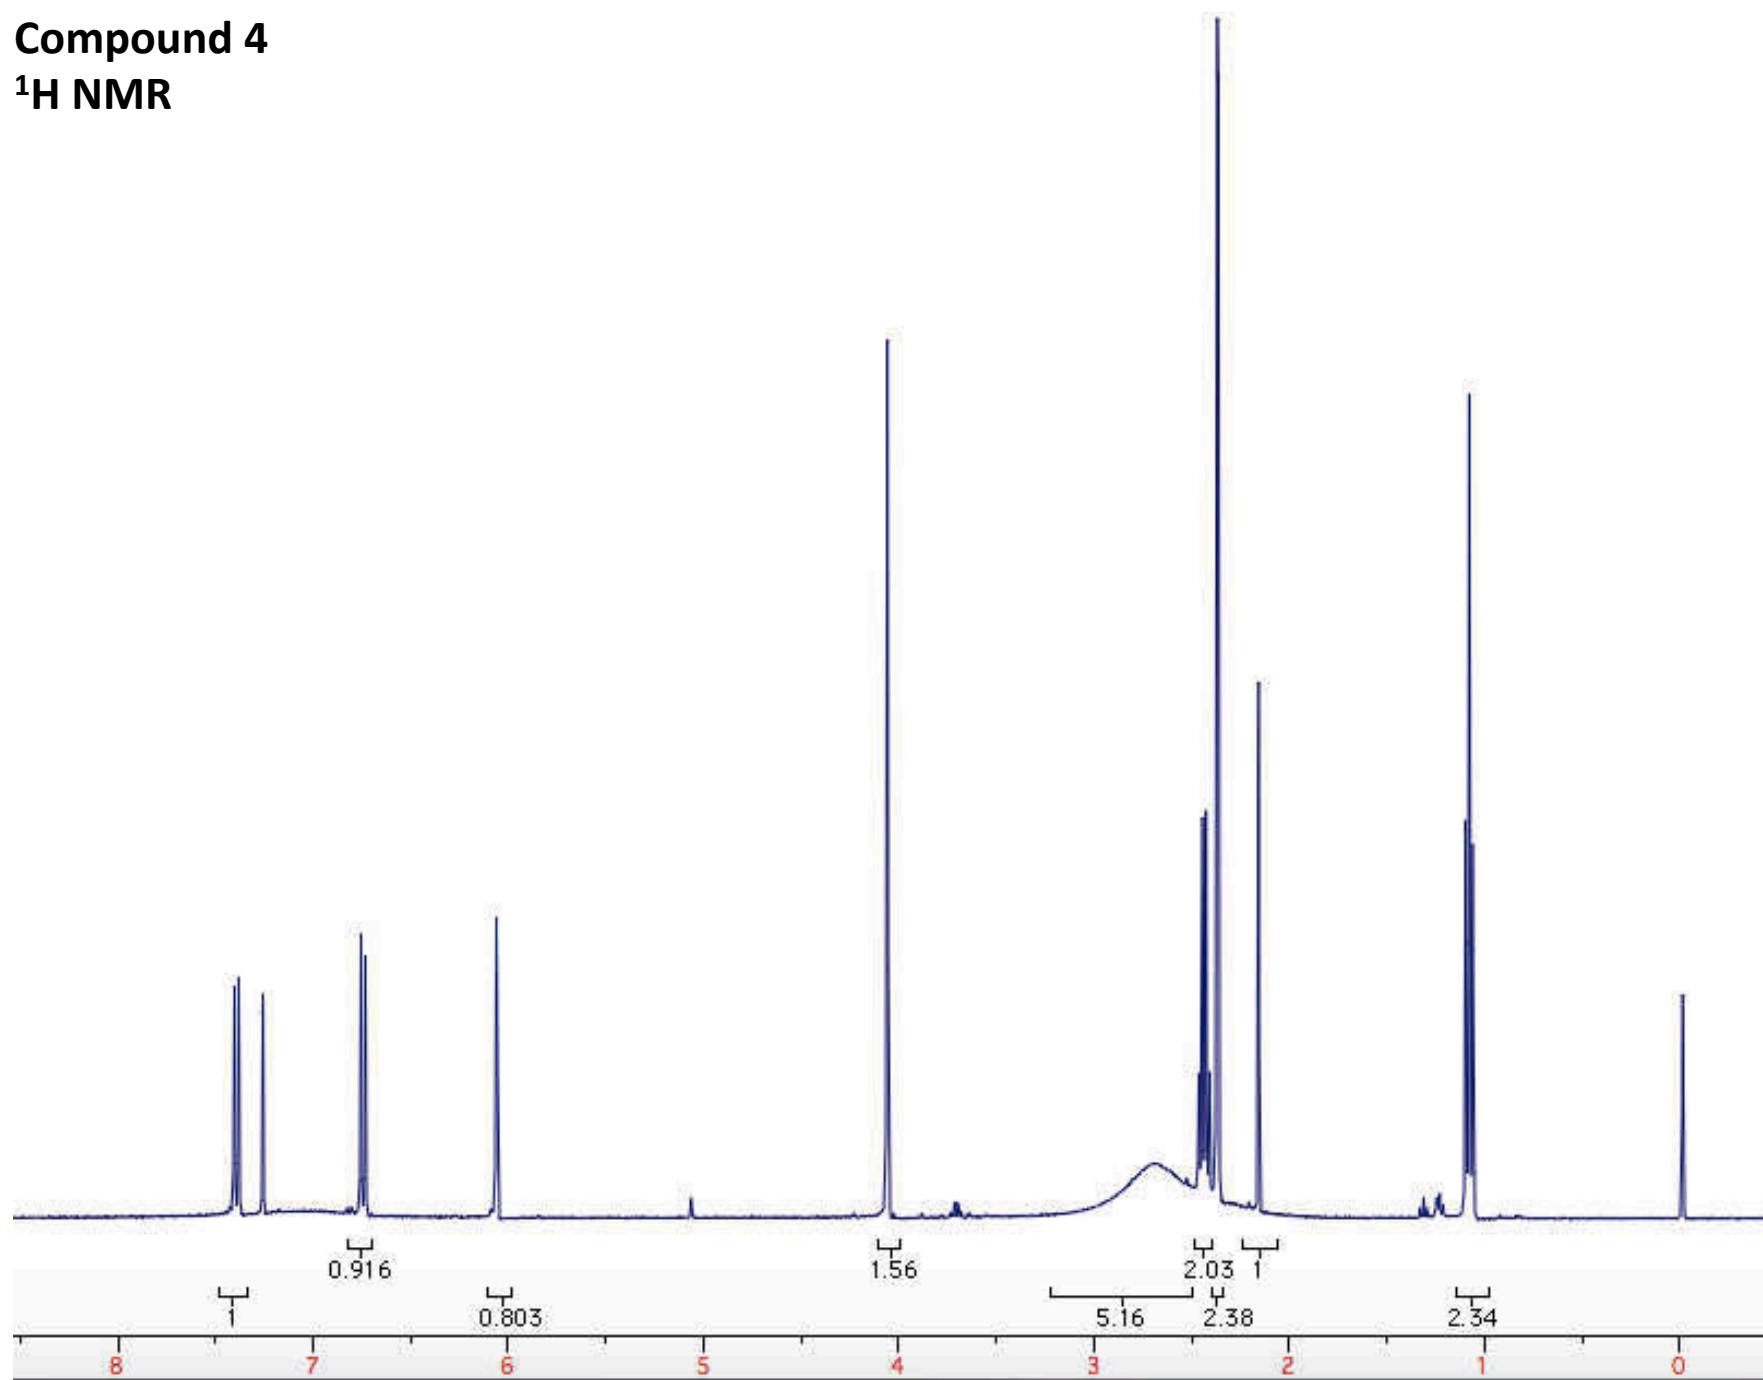

# Compound 4

## <sup>13</sup>C NMR

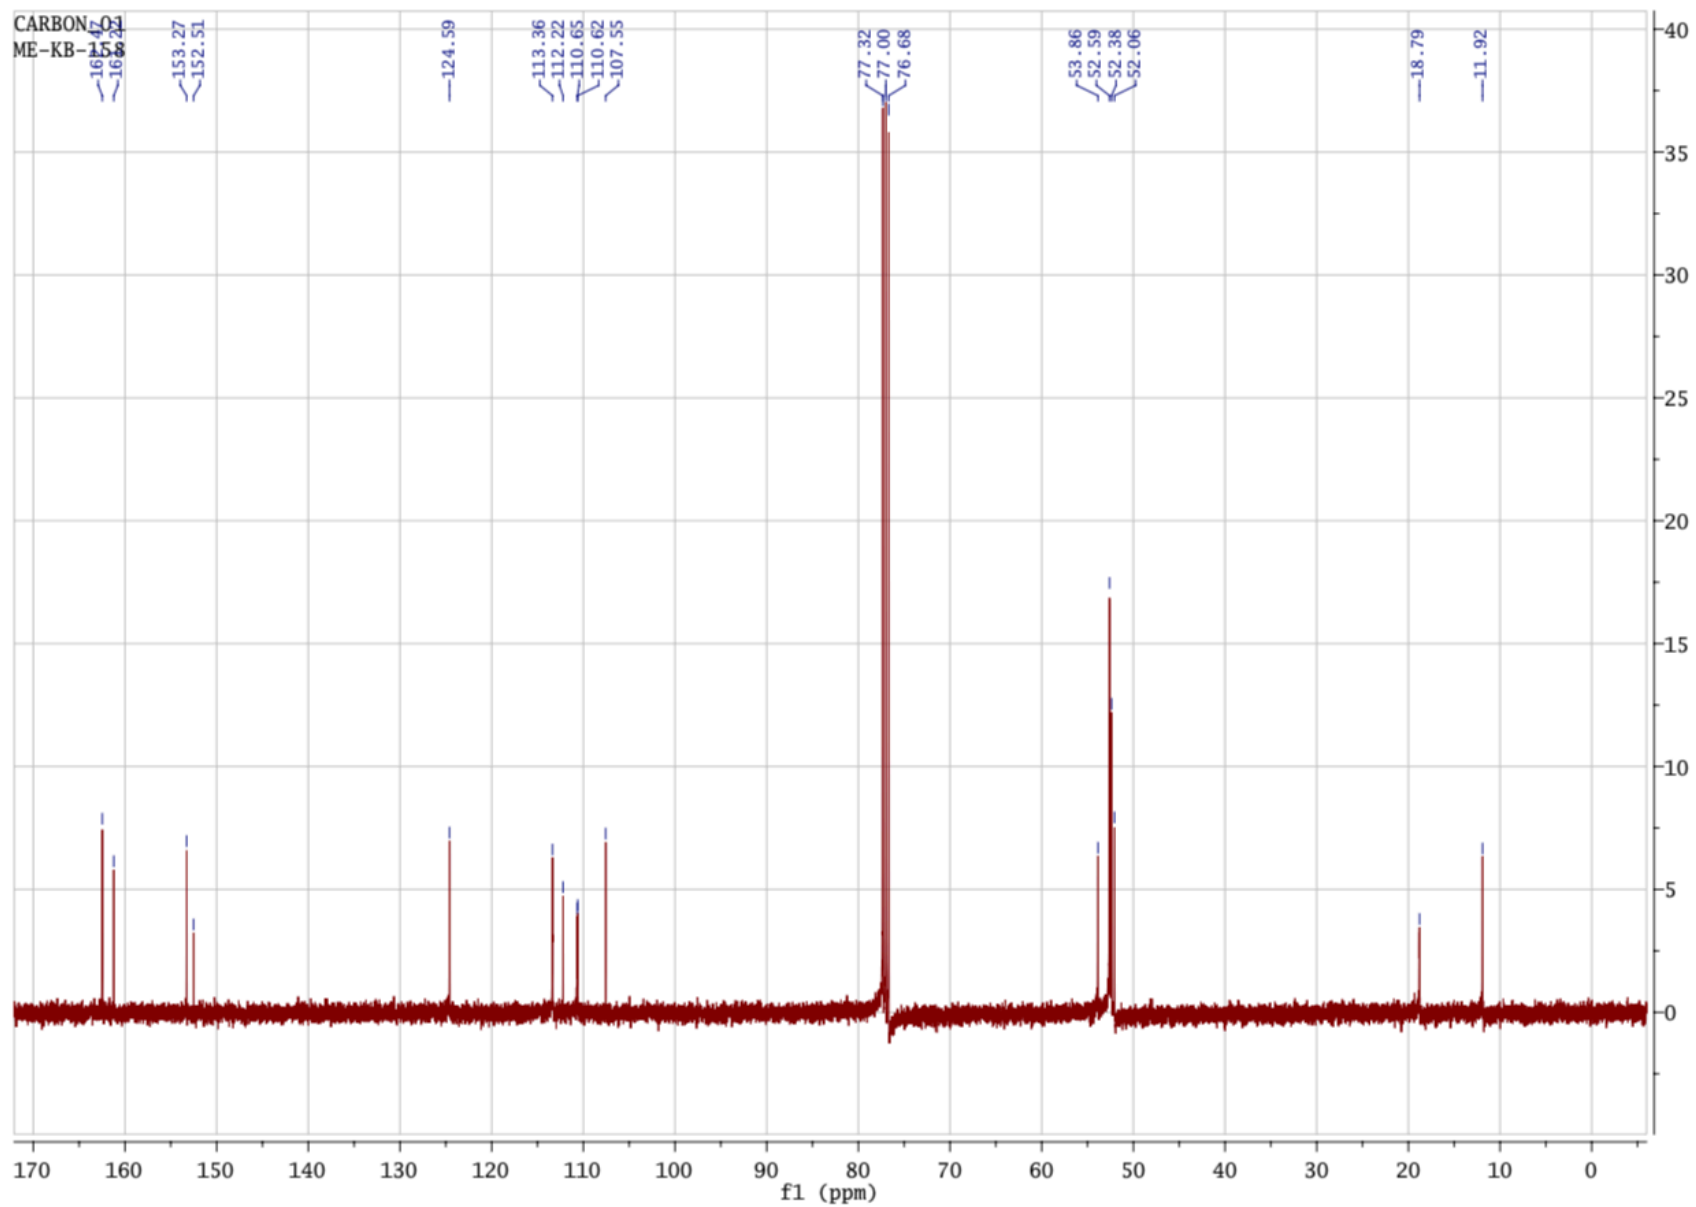

**Compound 5**  
 **$^1\text{H}$  NMR**

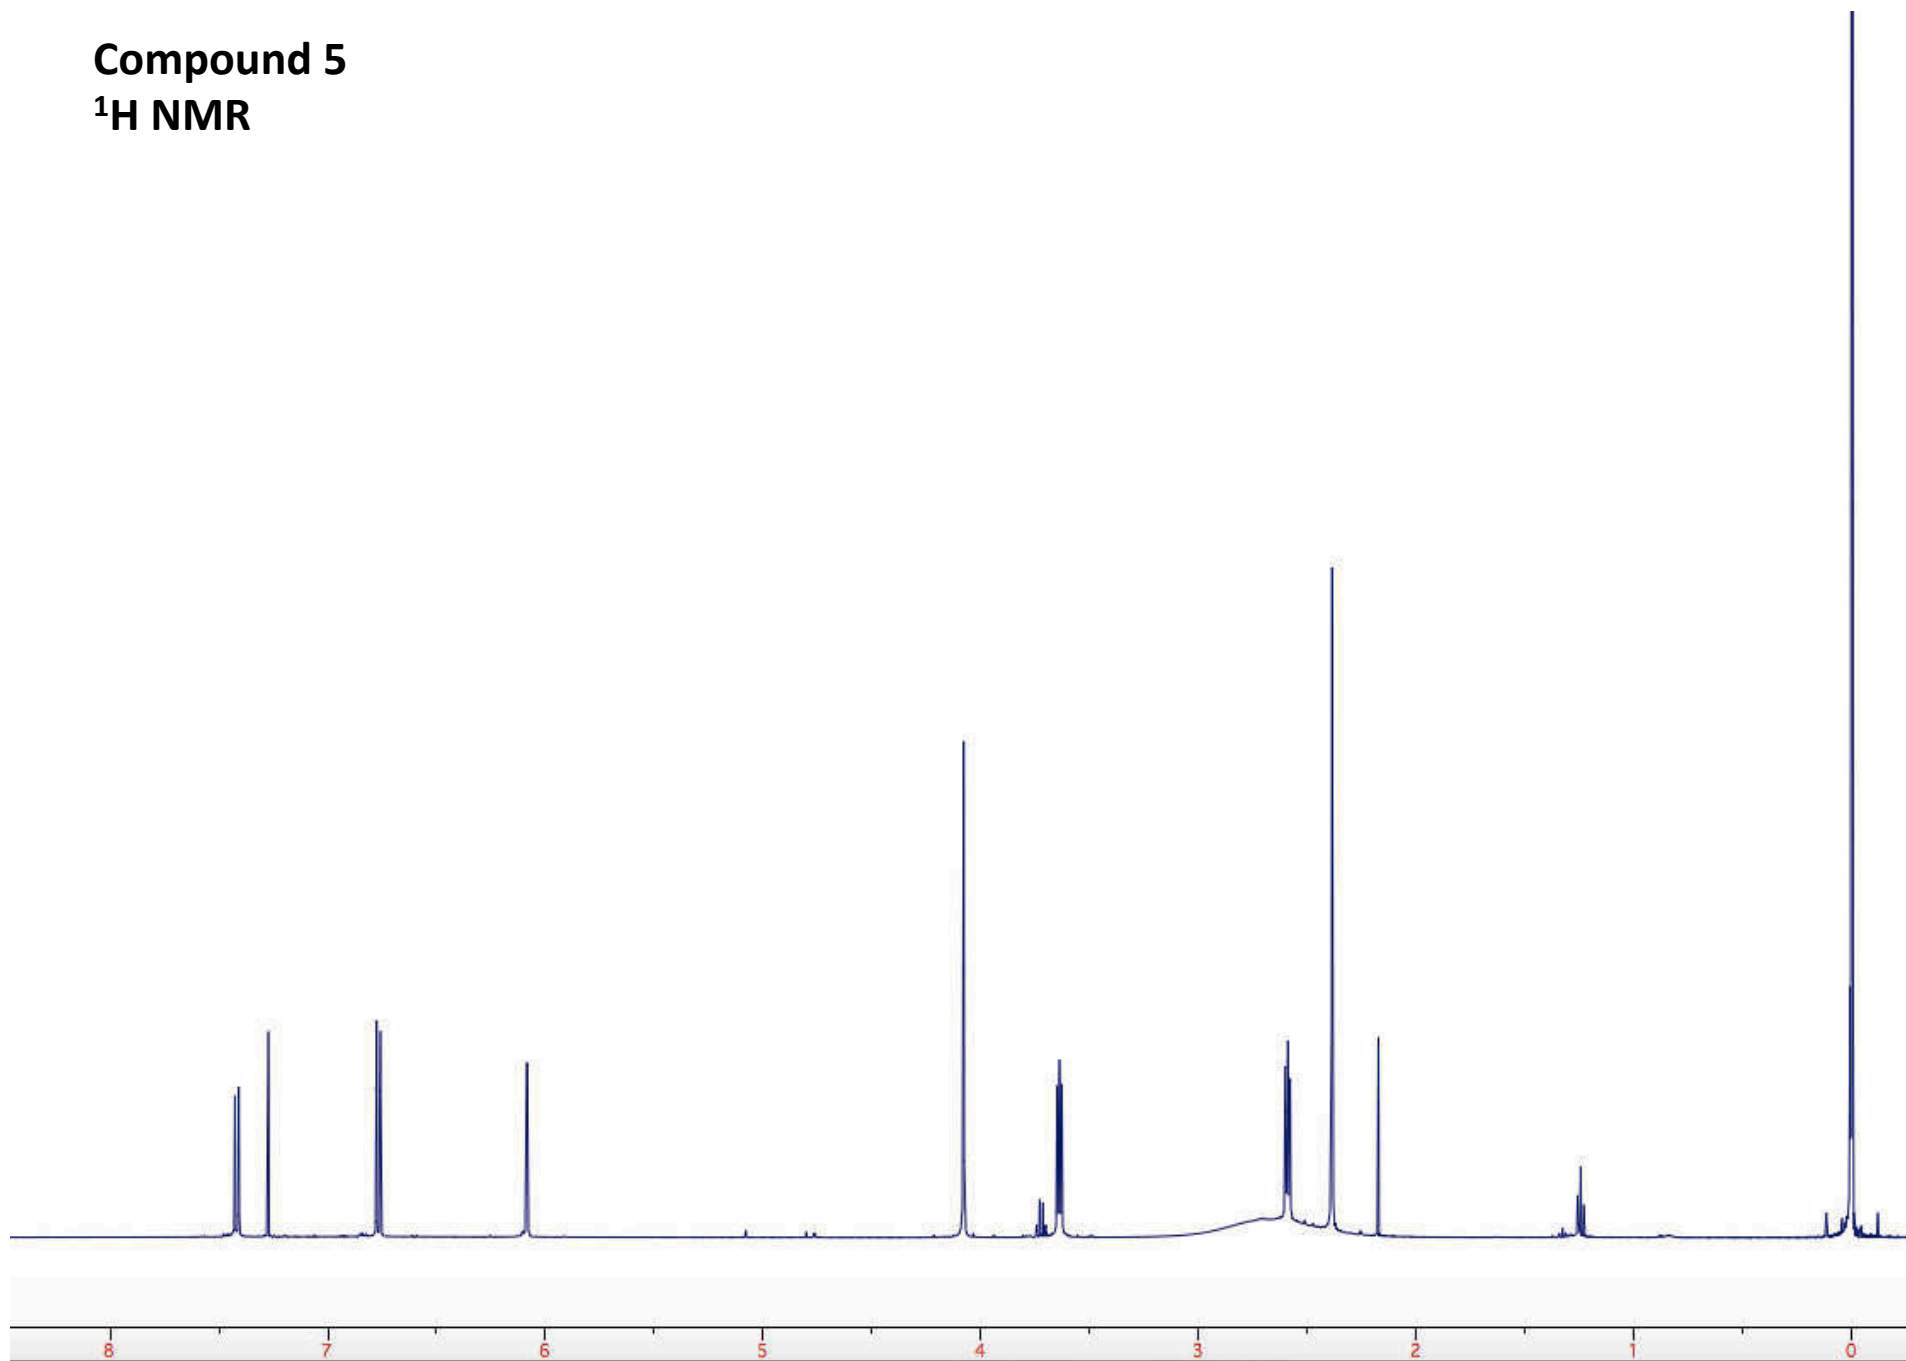

# Compound 5

## <sup>13</sup>C NMR

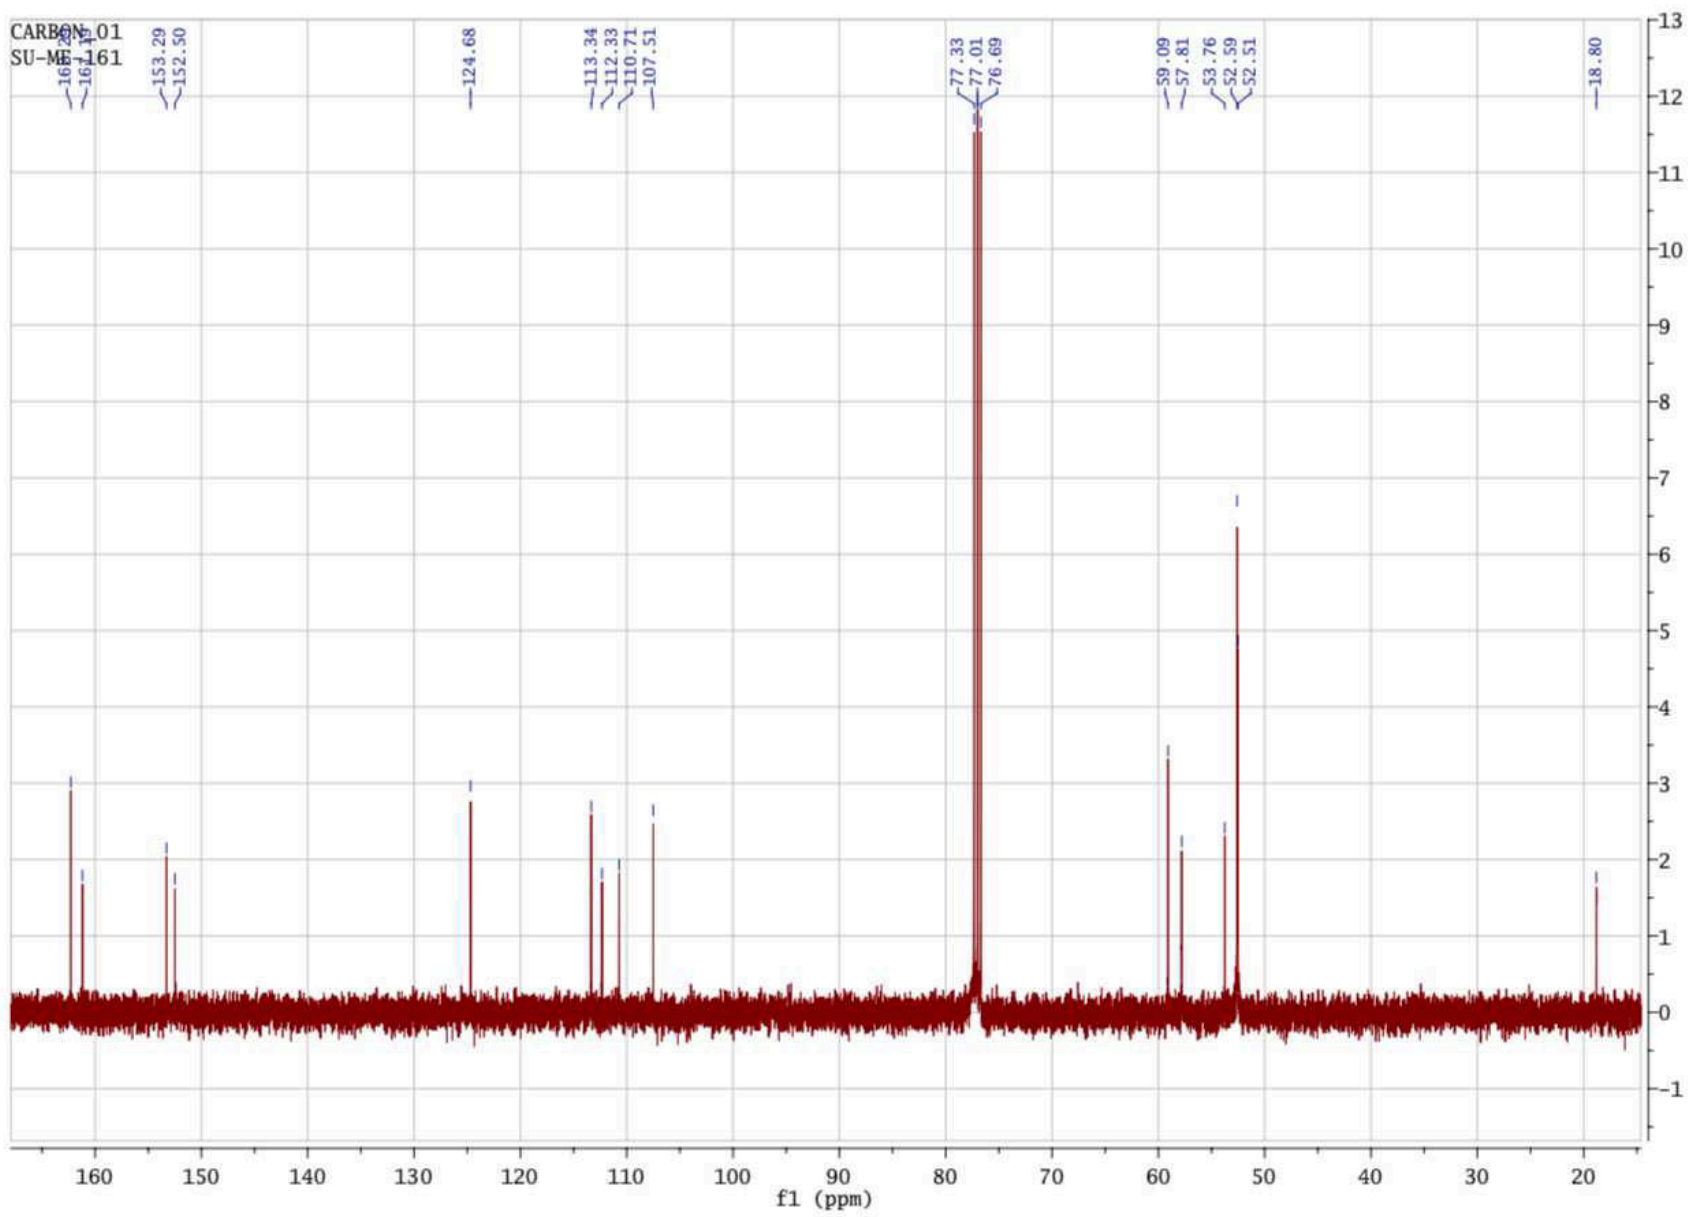

**Compound 6**  
 **$^1\text{H}$  NMR**

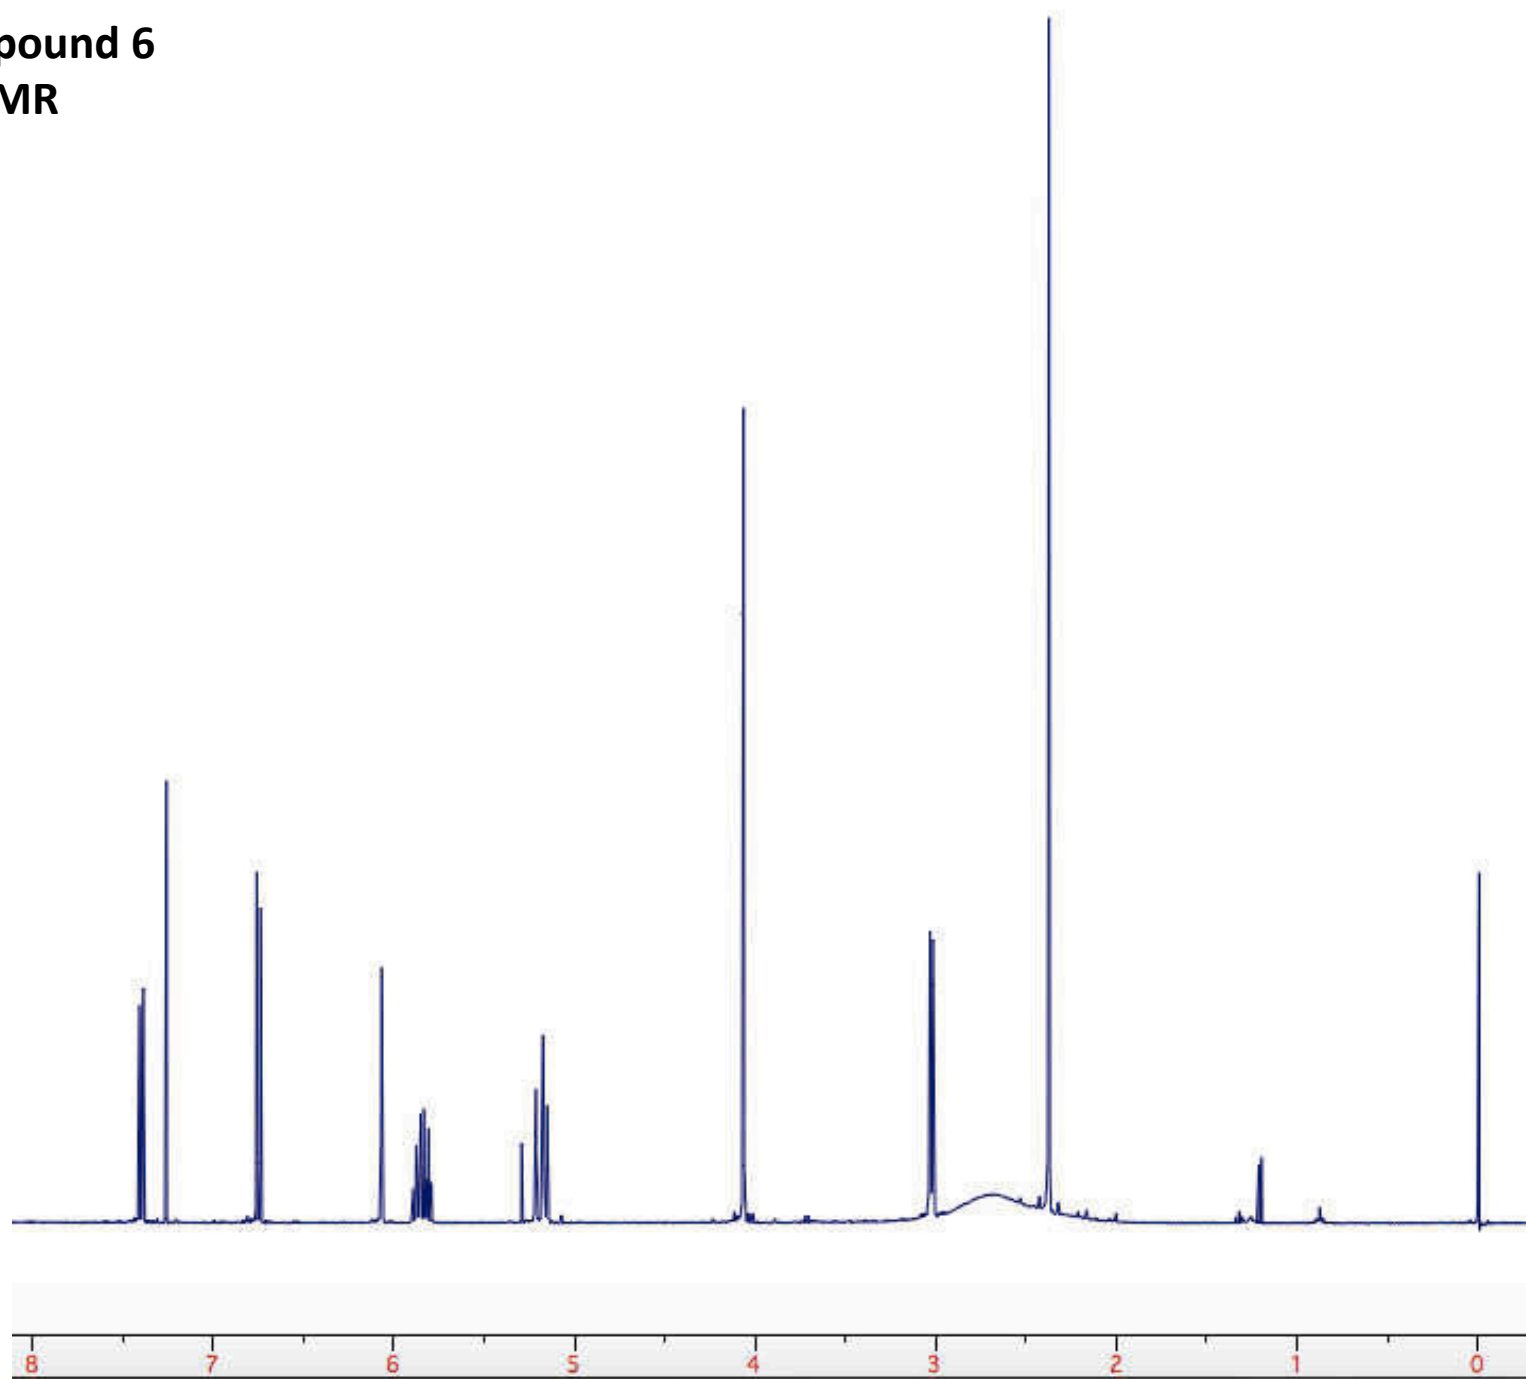

# Compound 6

## <sup>13</sup>C NMR

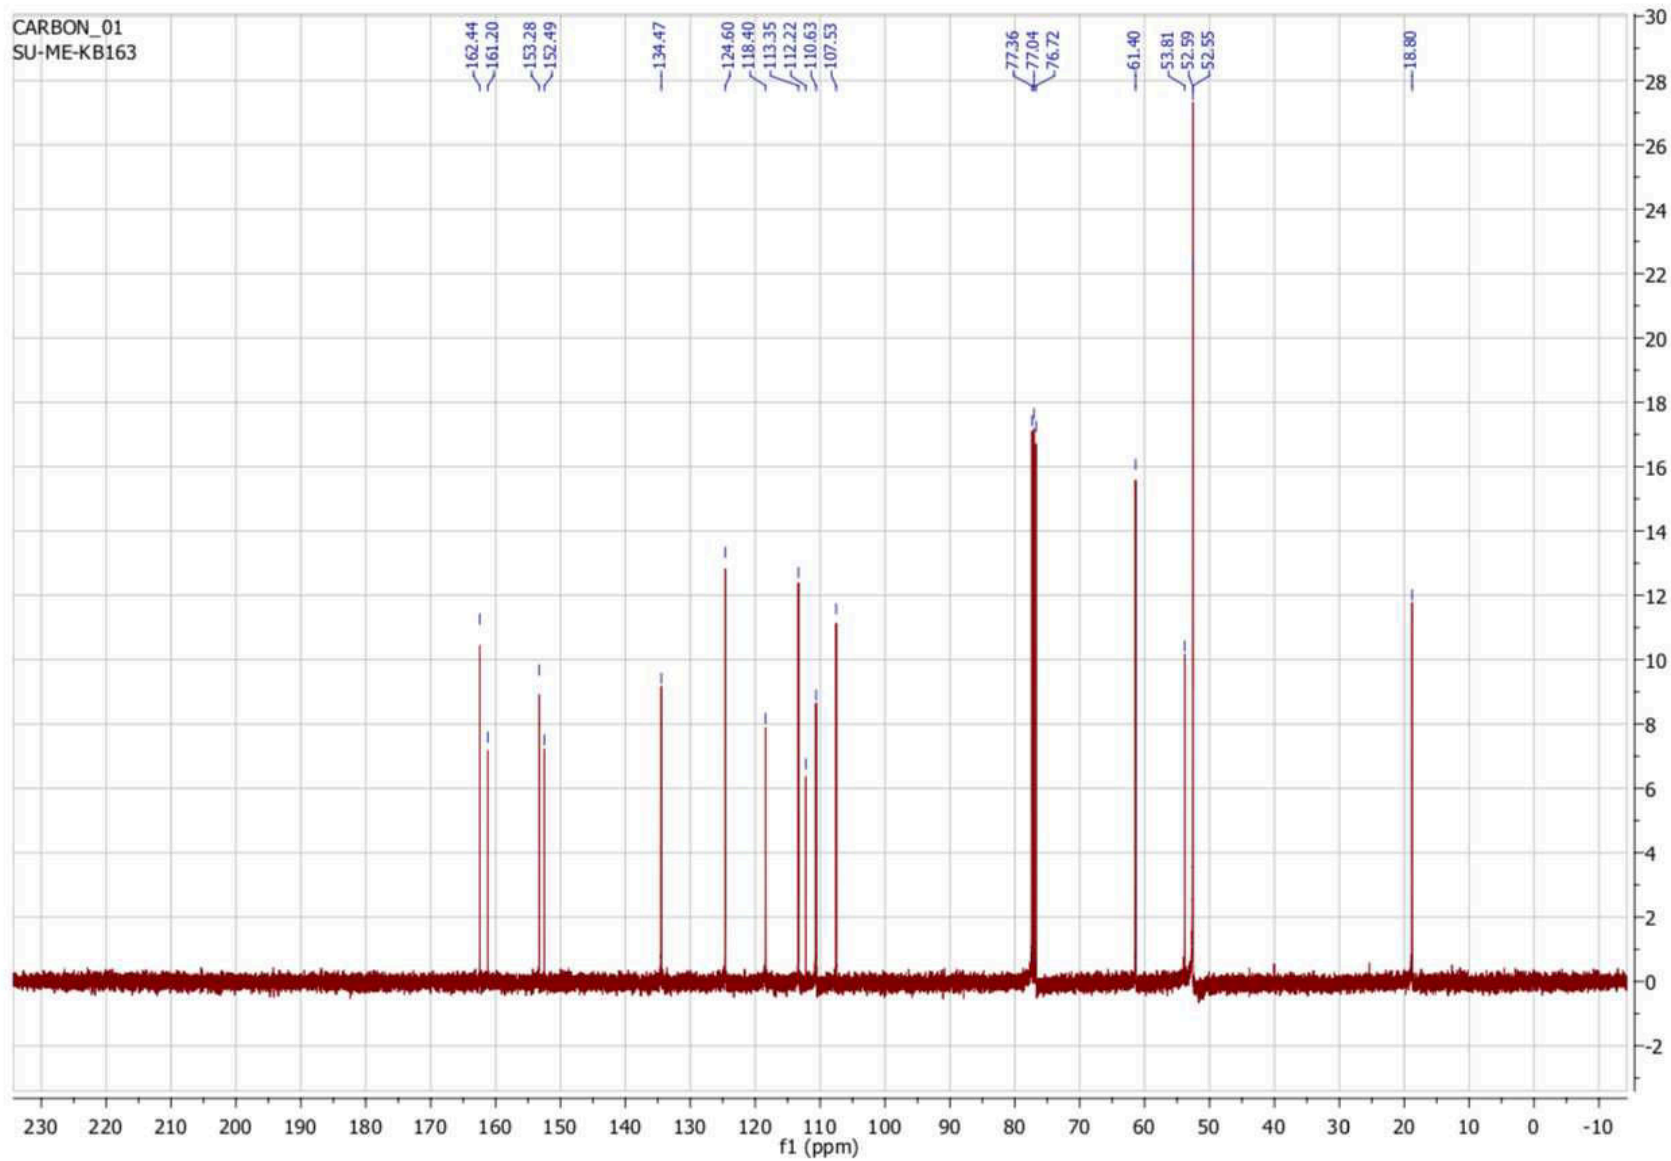

**Compound 7**  
 **$^1\text{H}$  NMR**

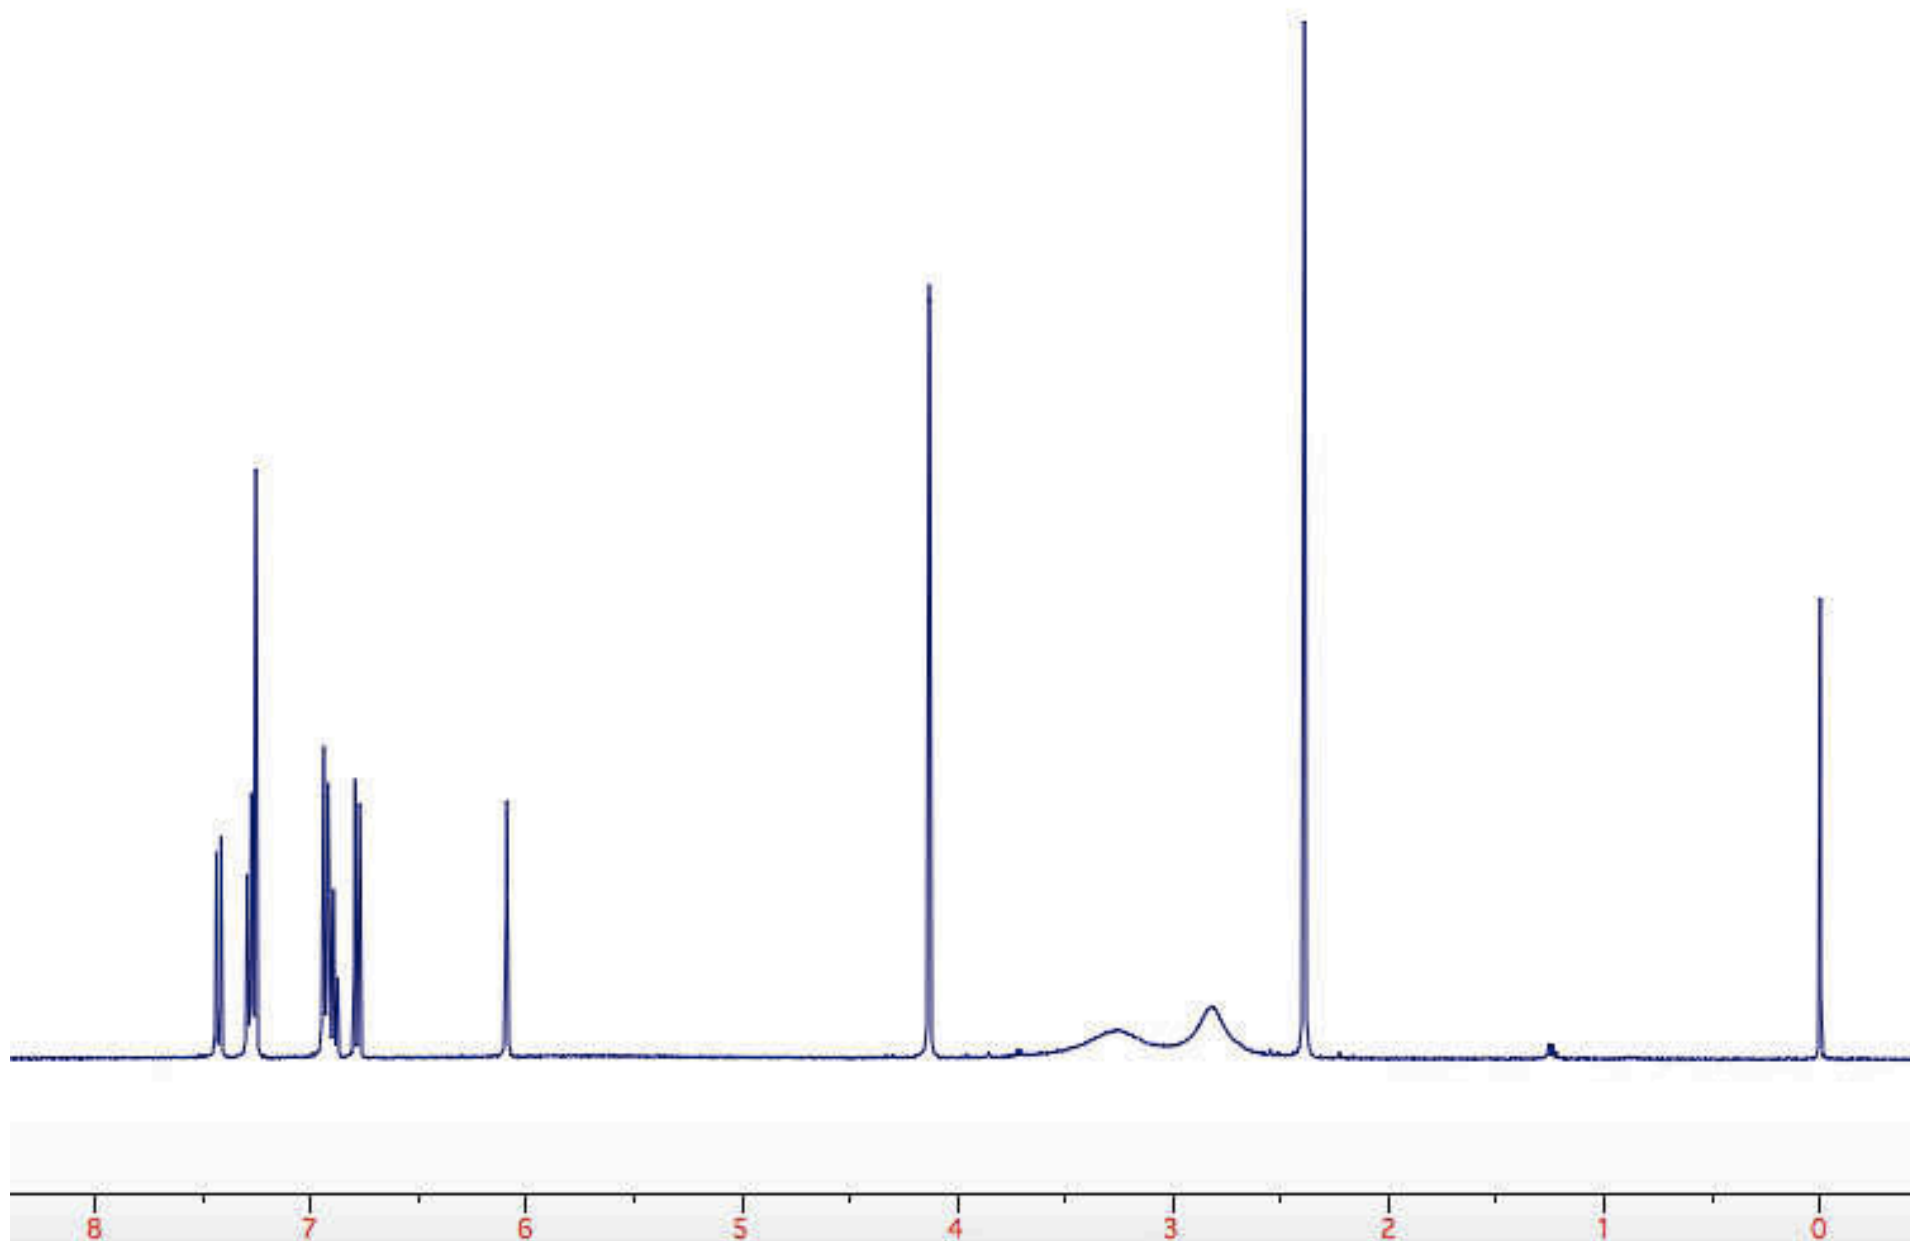



# Compound 7

## <sup>13</sup>C NMR

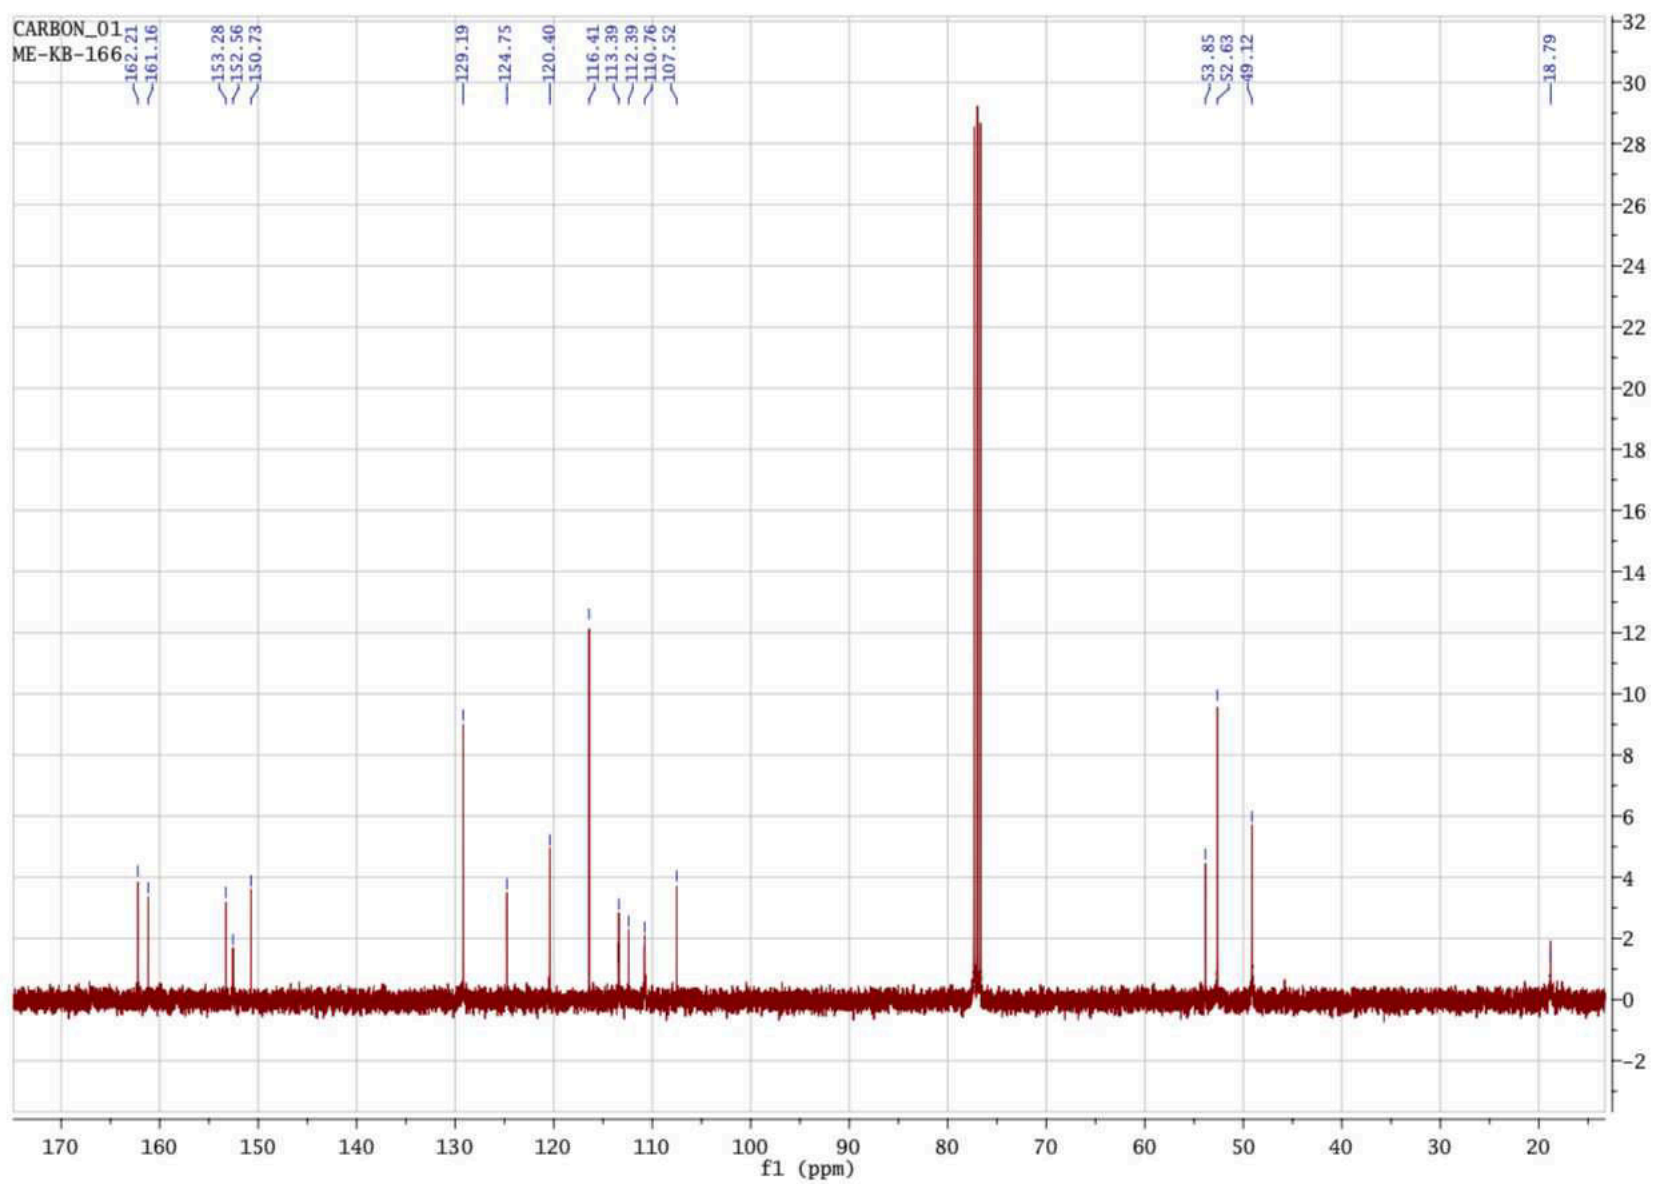

**Compound 8**  
 **$^1\text{H}$  NMR**

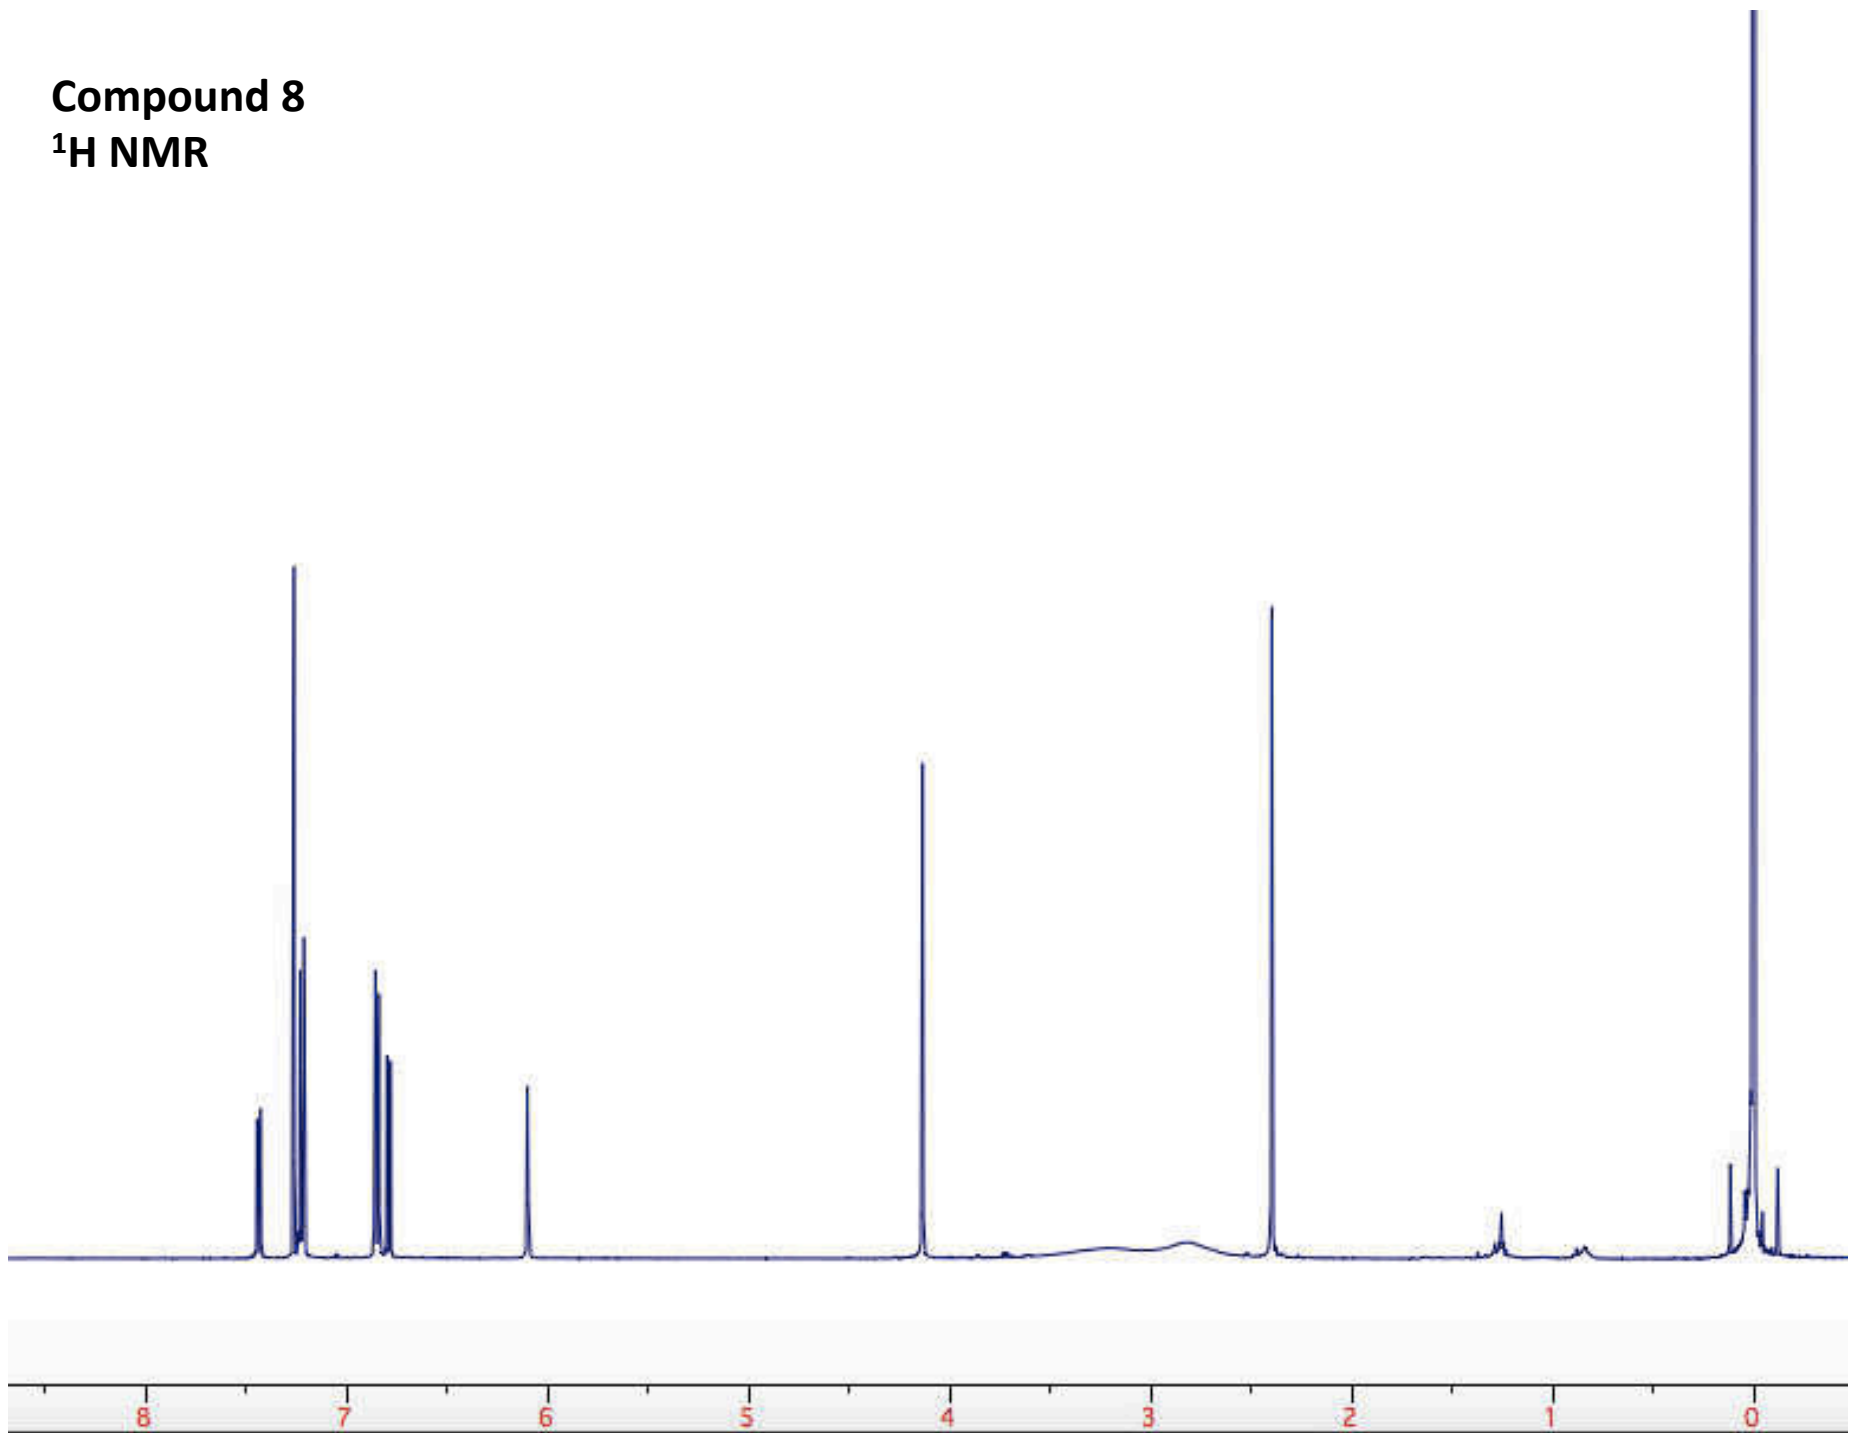

# Compound 8

## <sup>13</sup>C NMR

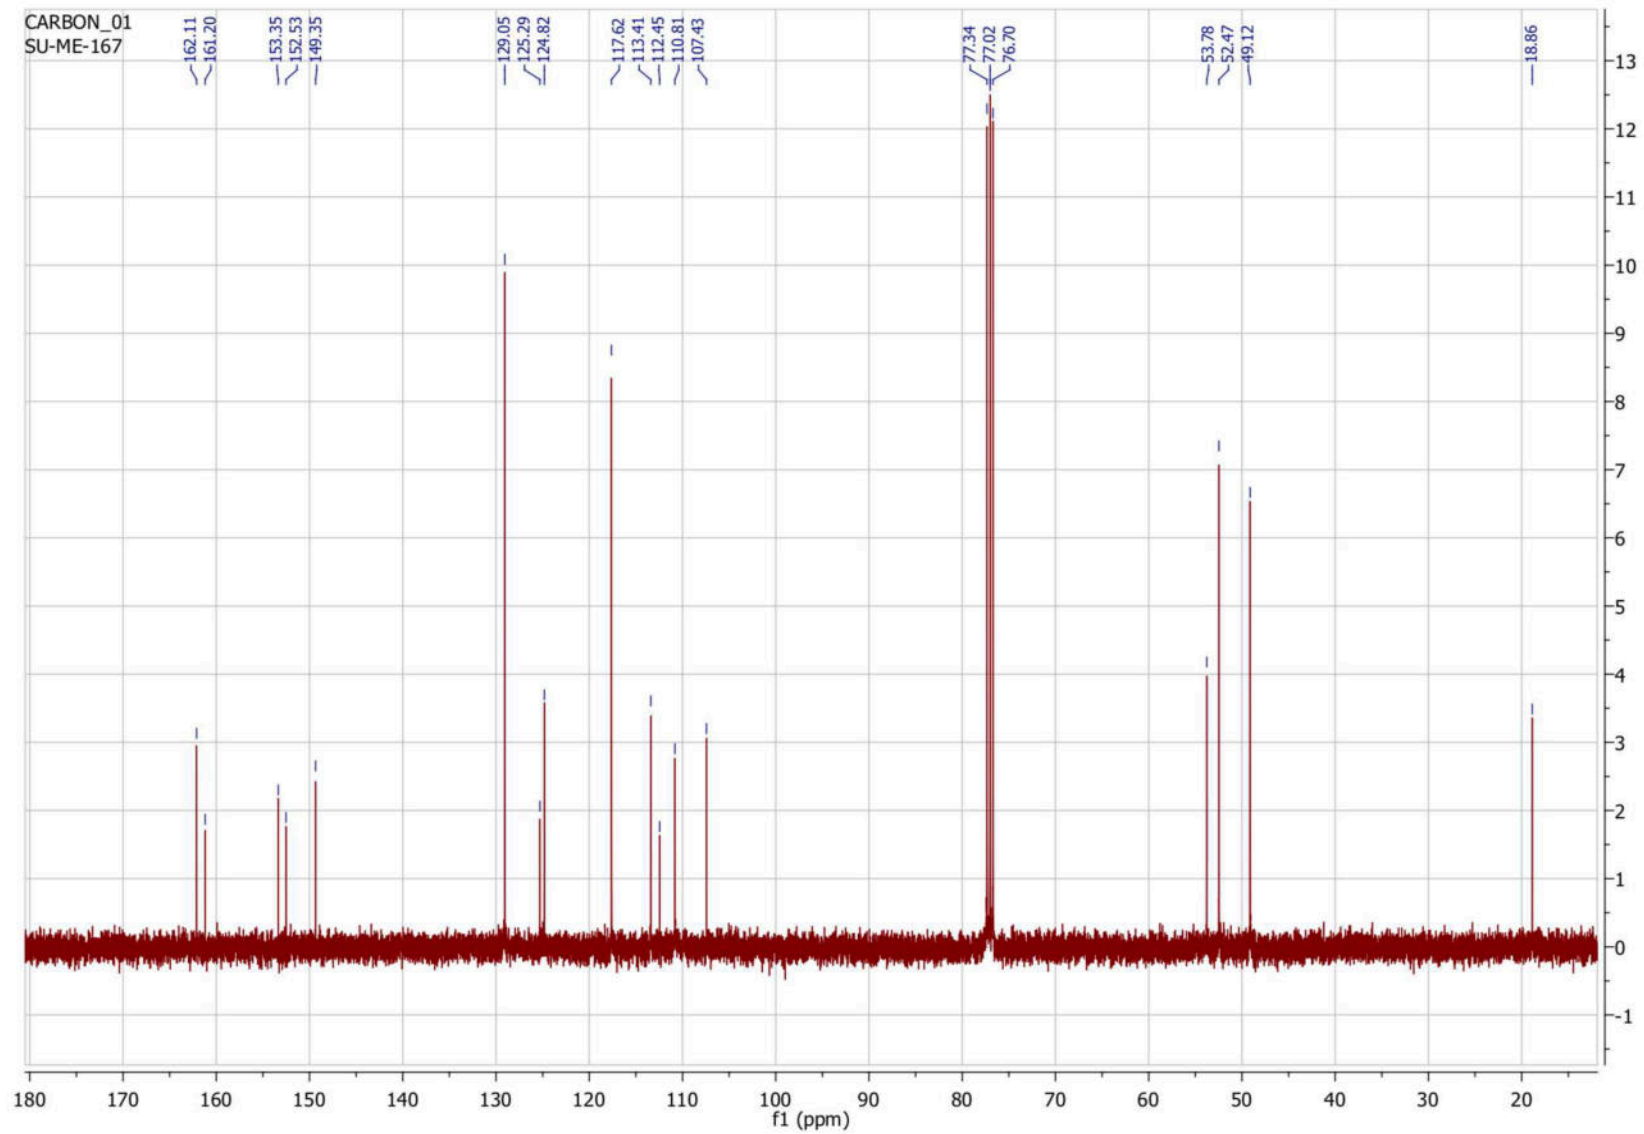

# Compound 9

## <sup>1</sup>H NMR

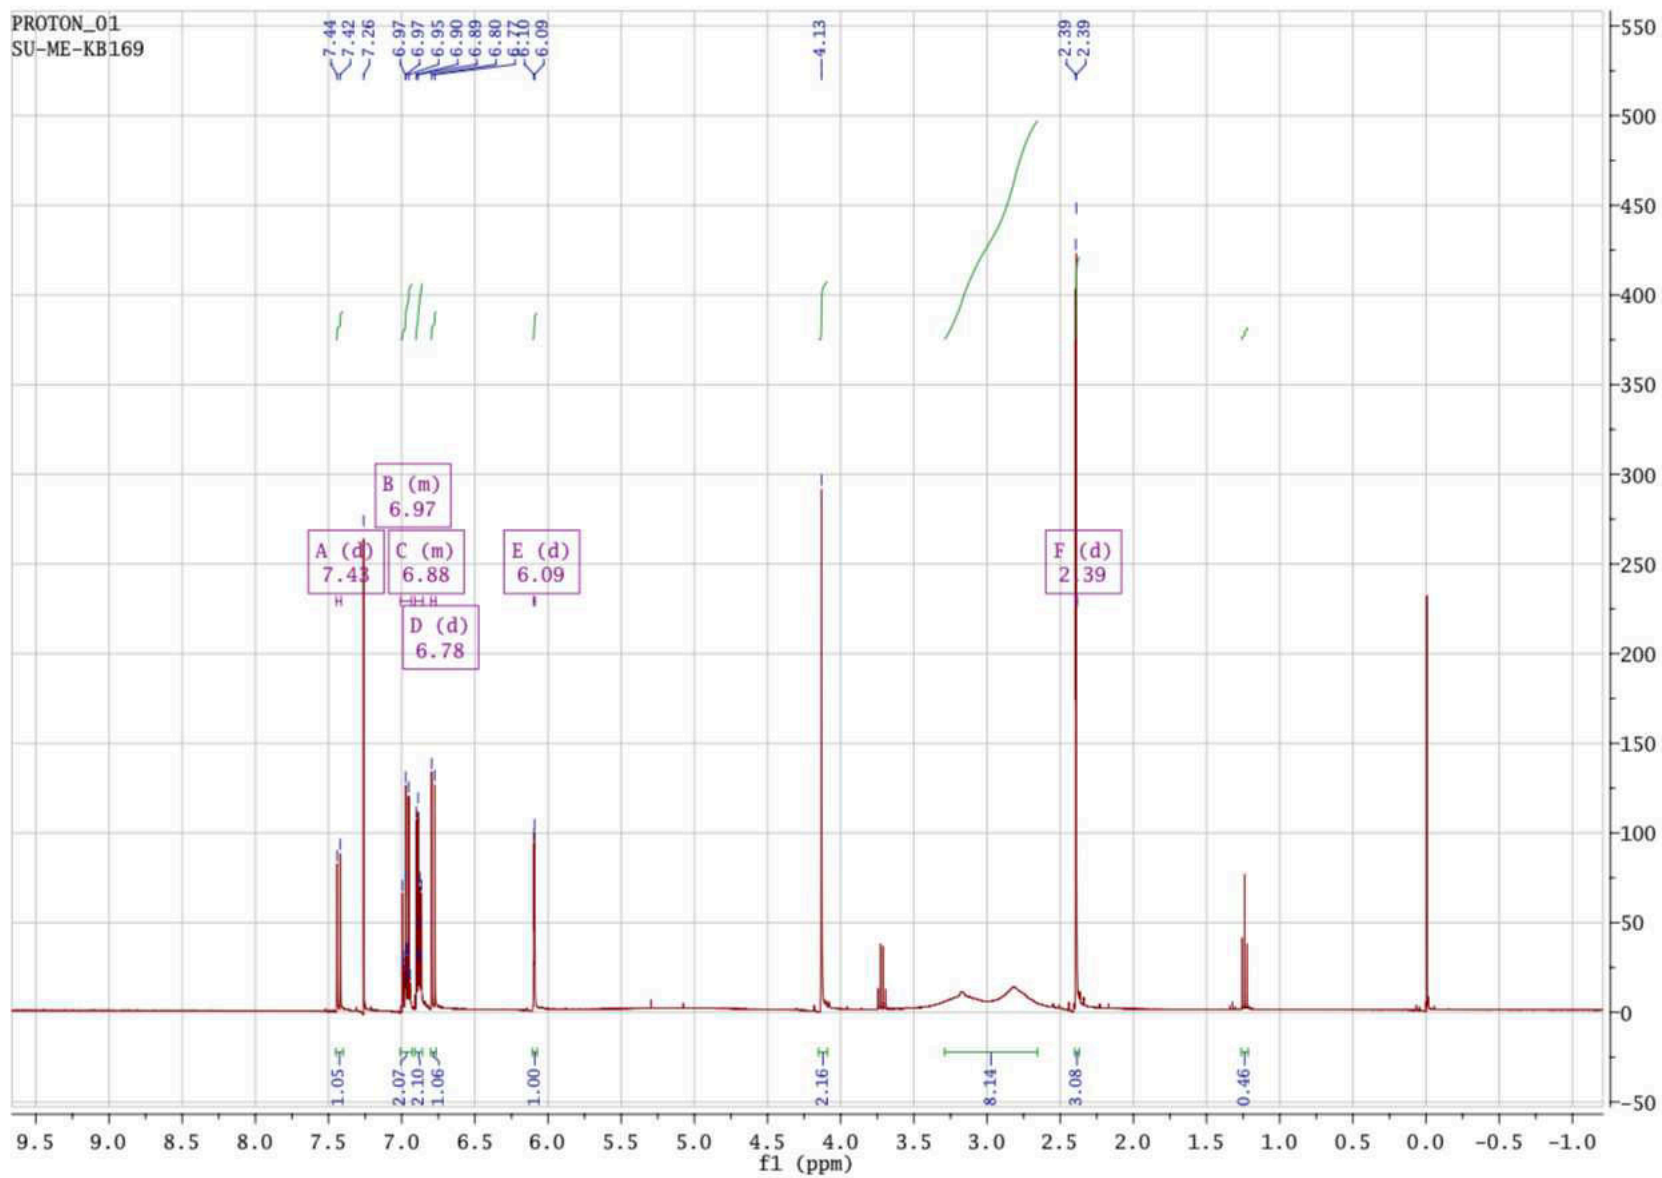

# Compound 9

## <sup>13</sup>C NMR

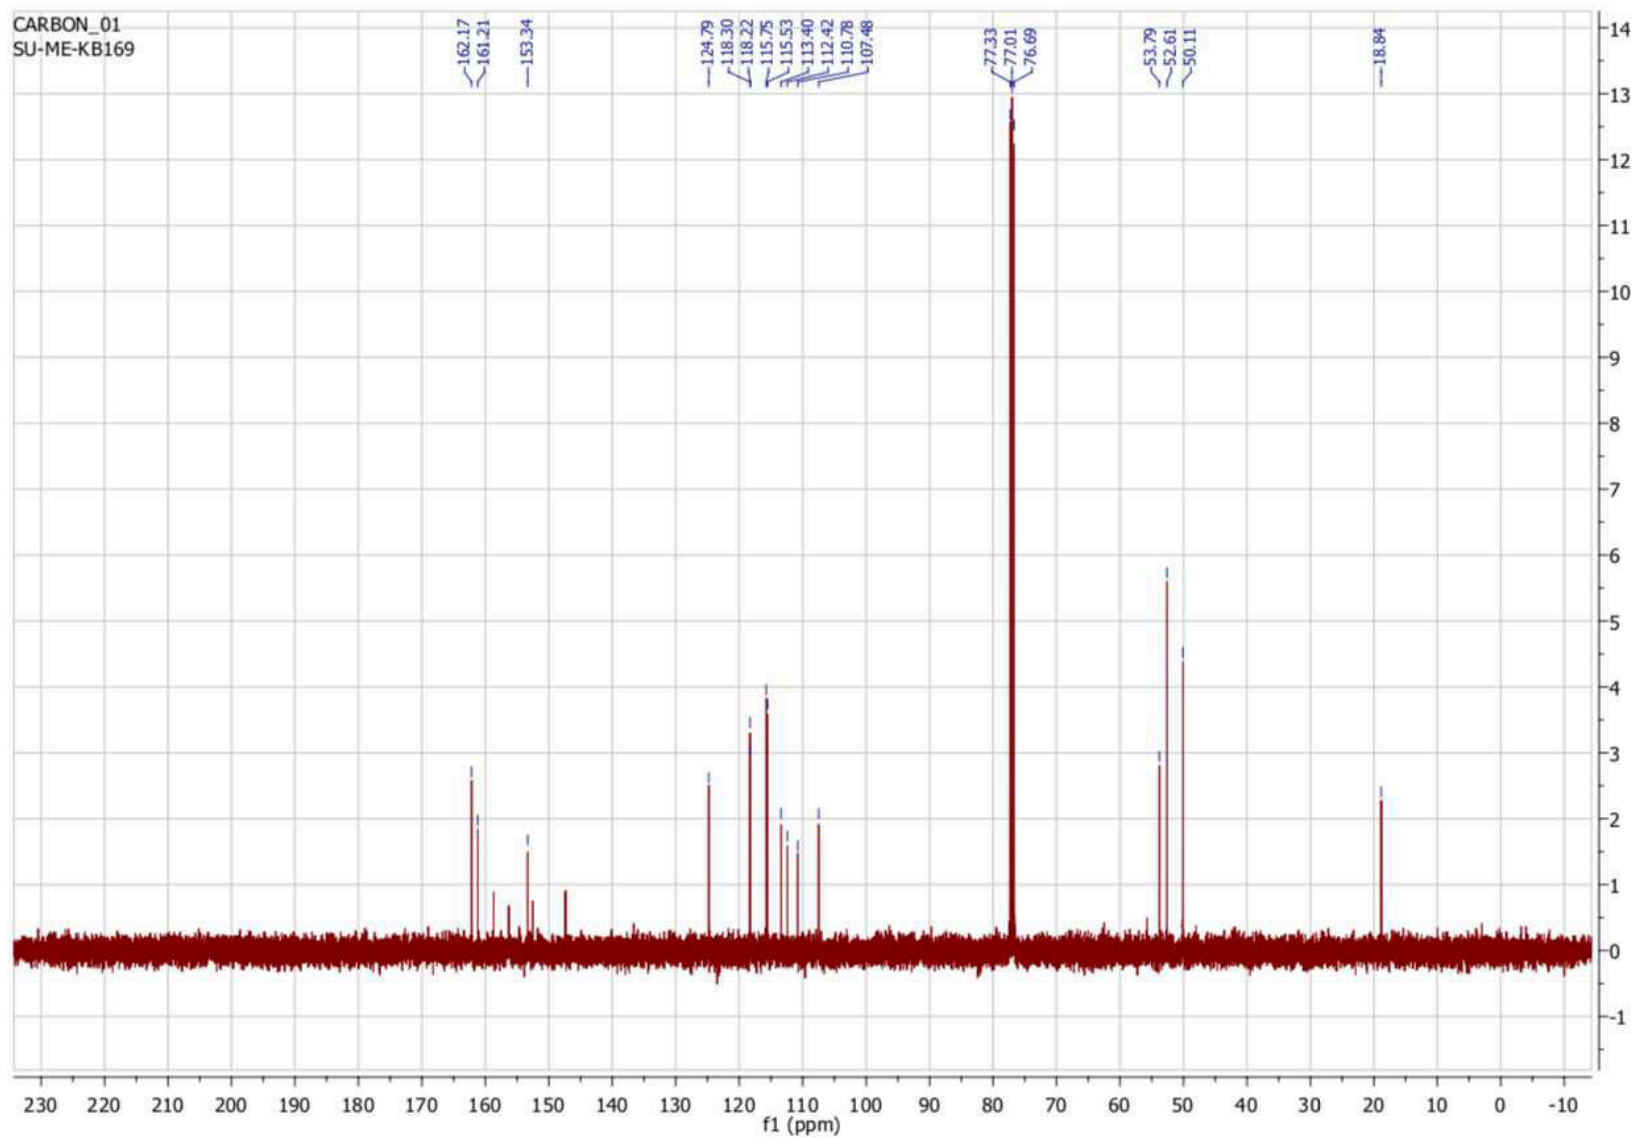

**Compound 10**  
 **$^1\text{H}$  NMR**

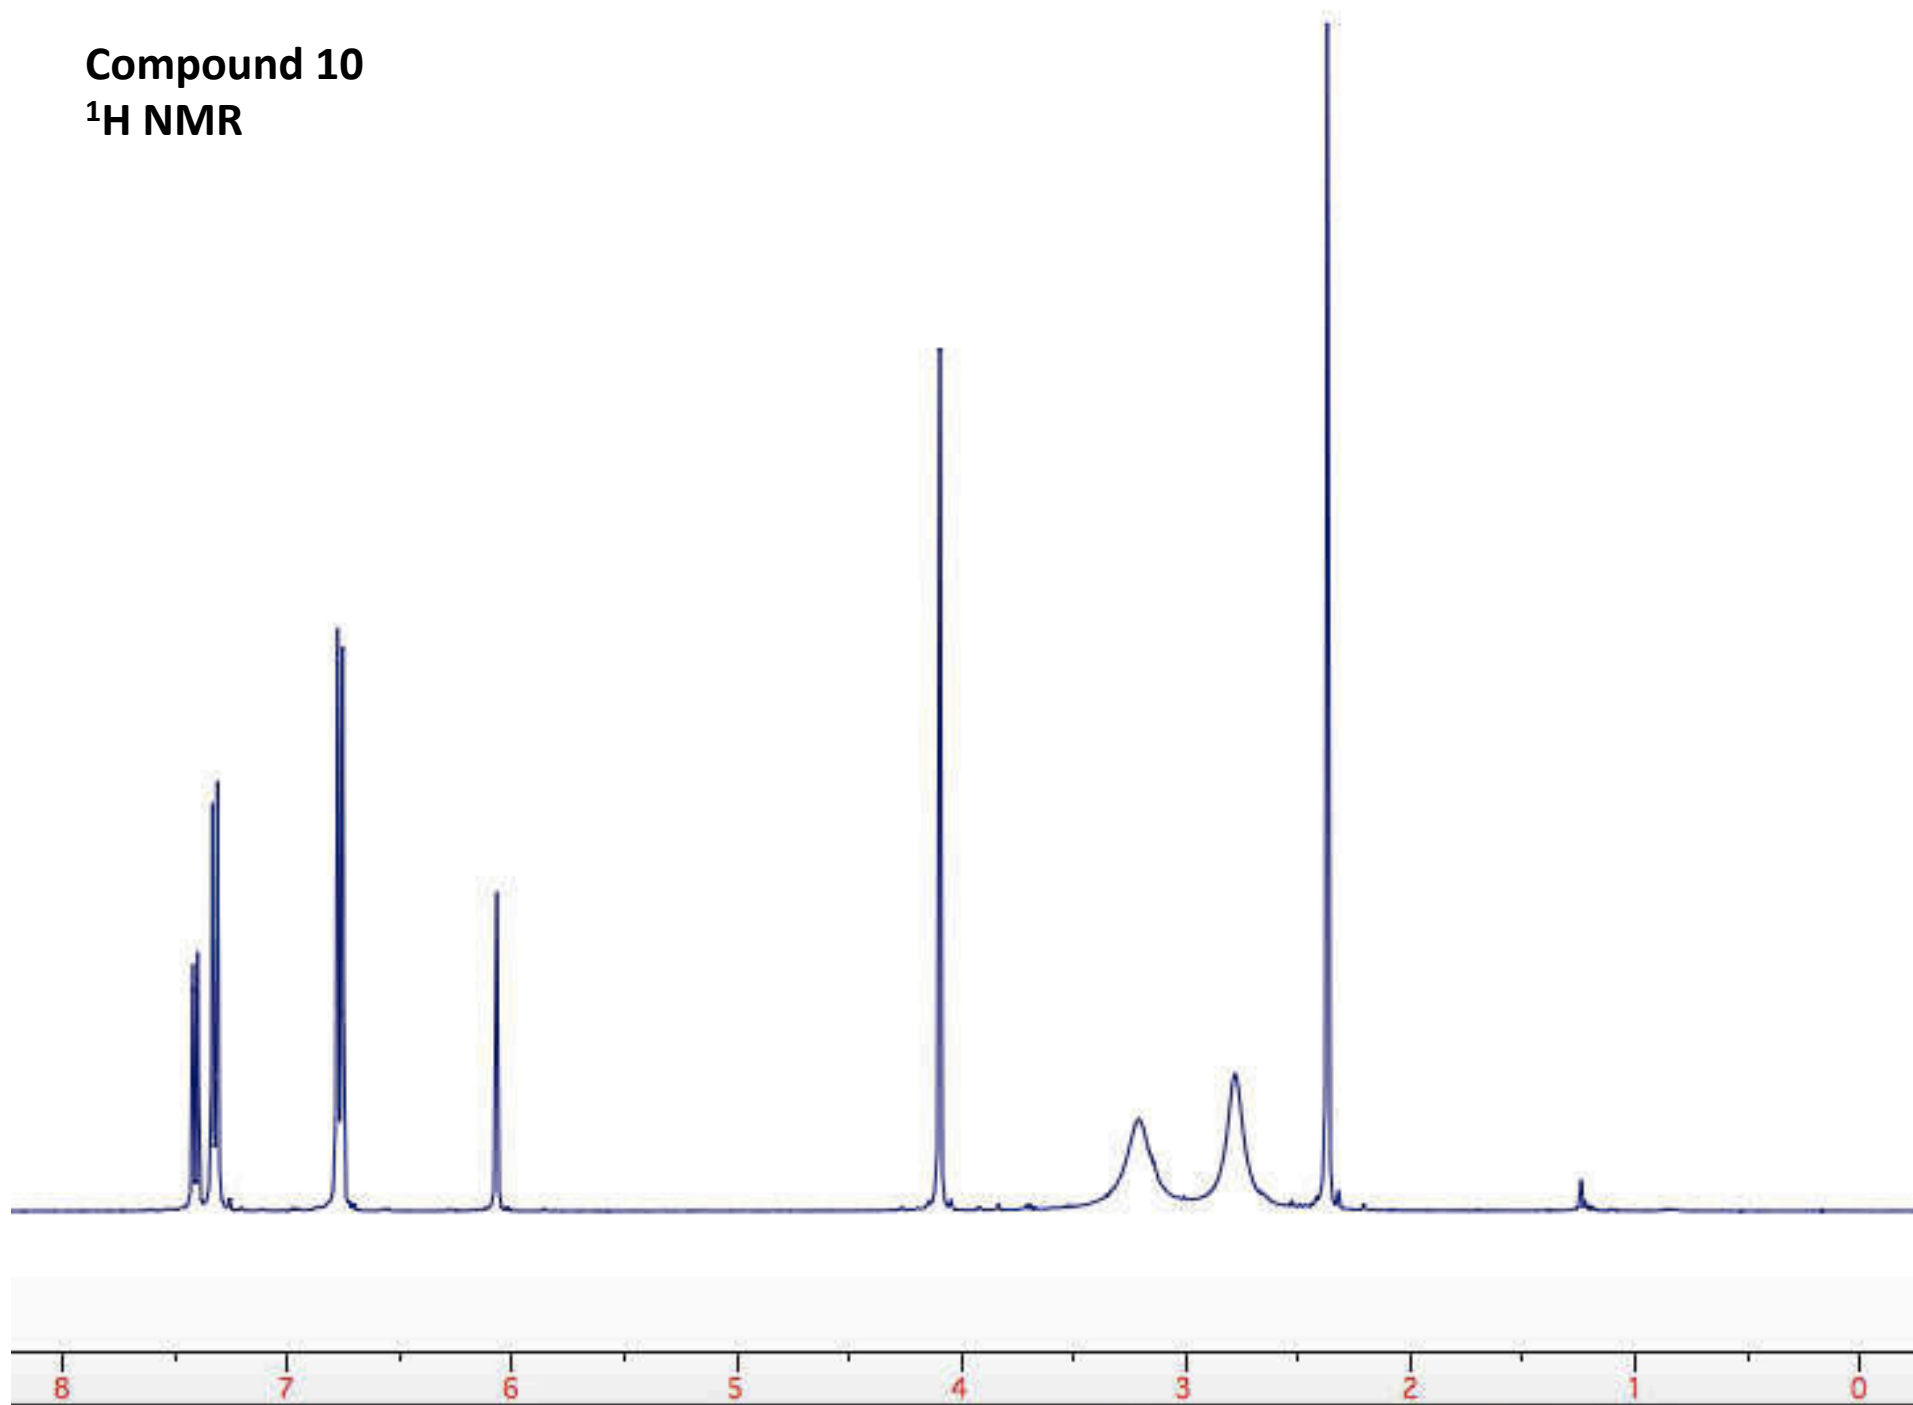

# Compound 10

## <sup>13</sup>C NMR

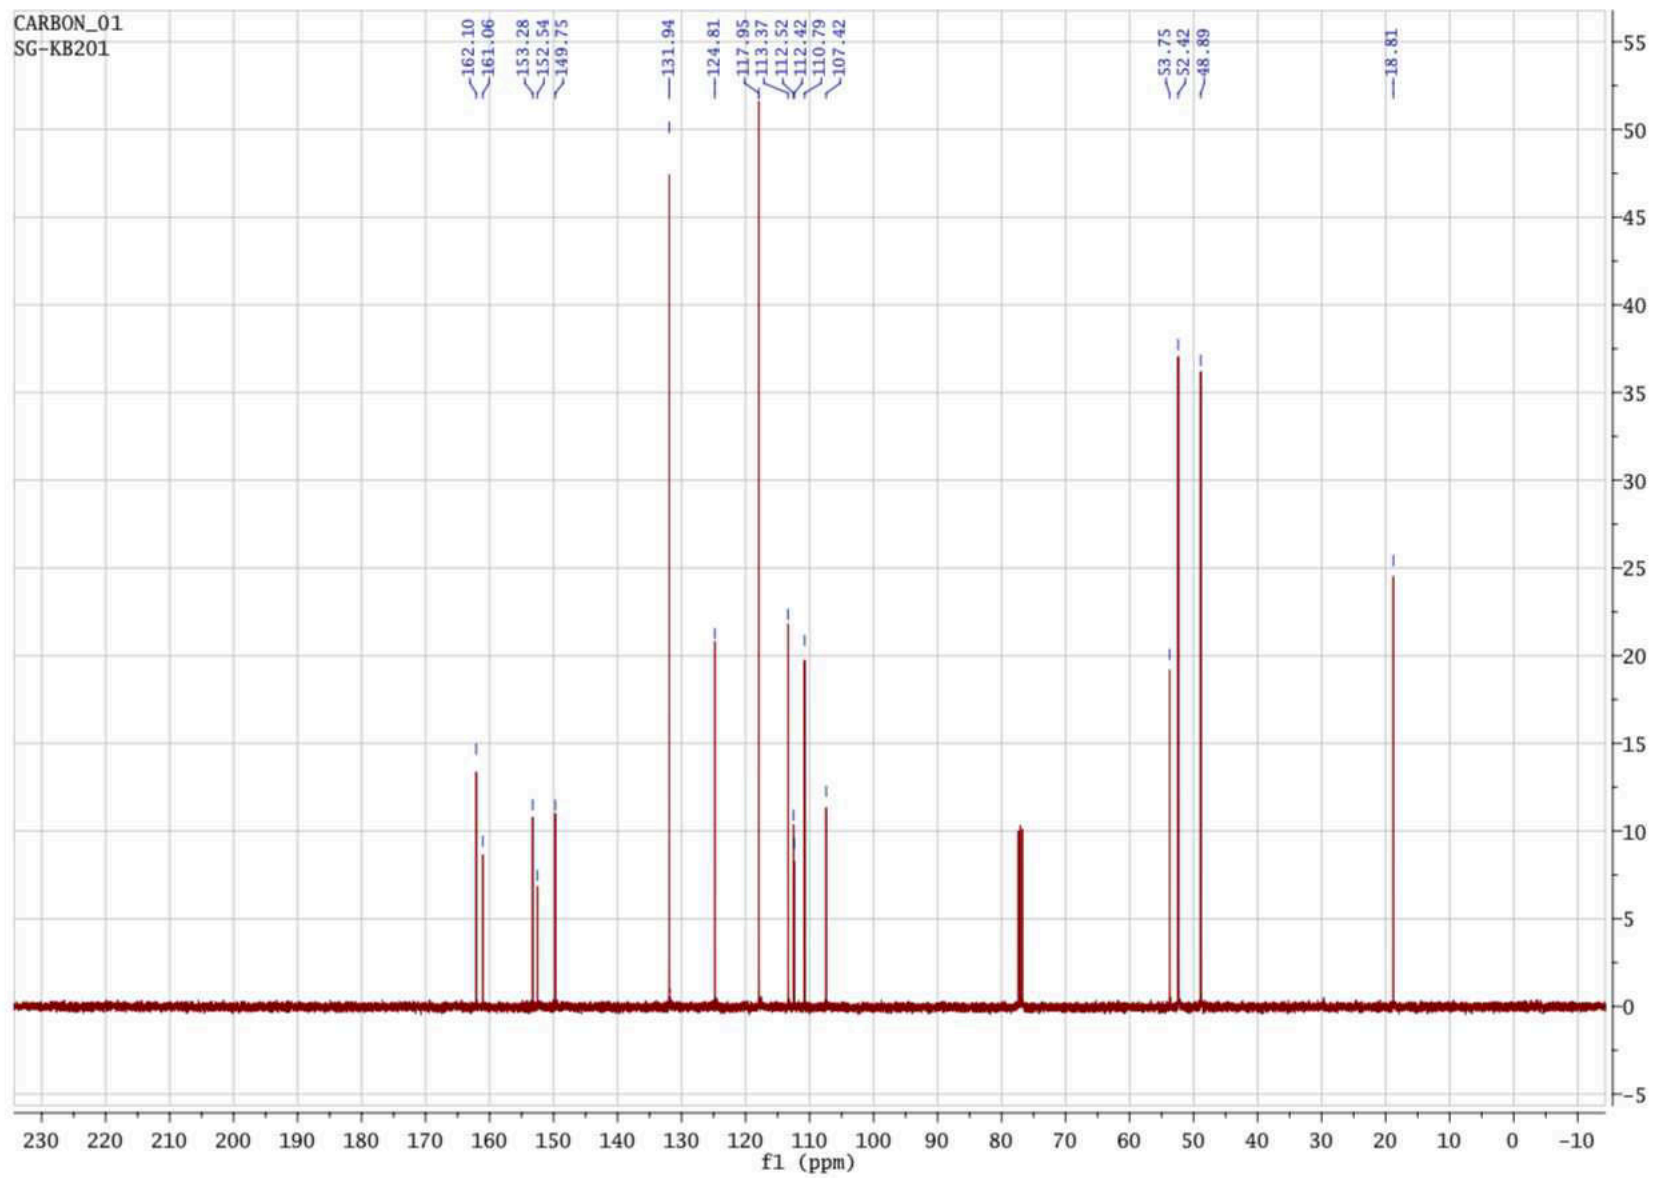

**Compound 11**  
 **$^1\text{H}$  NMR**

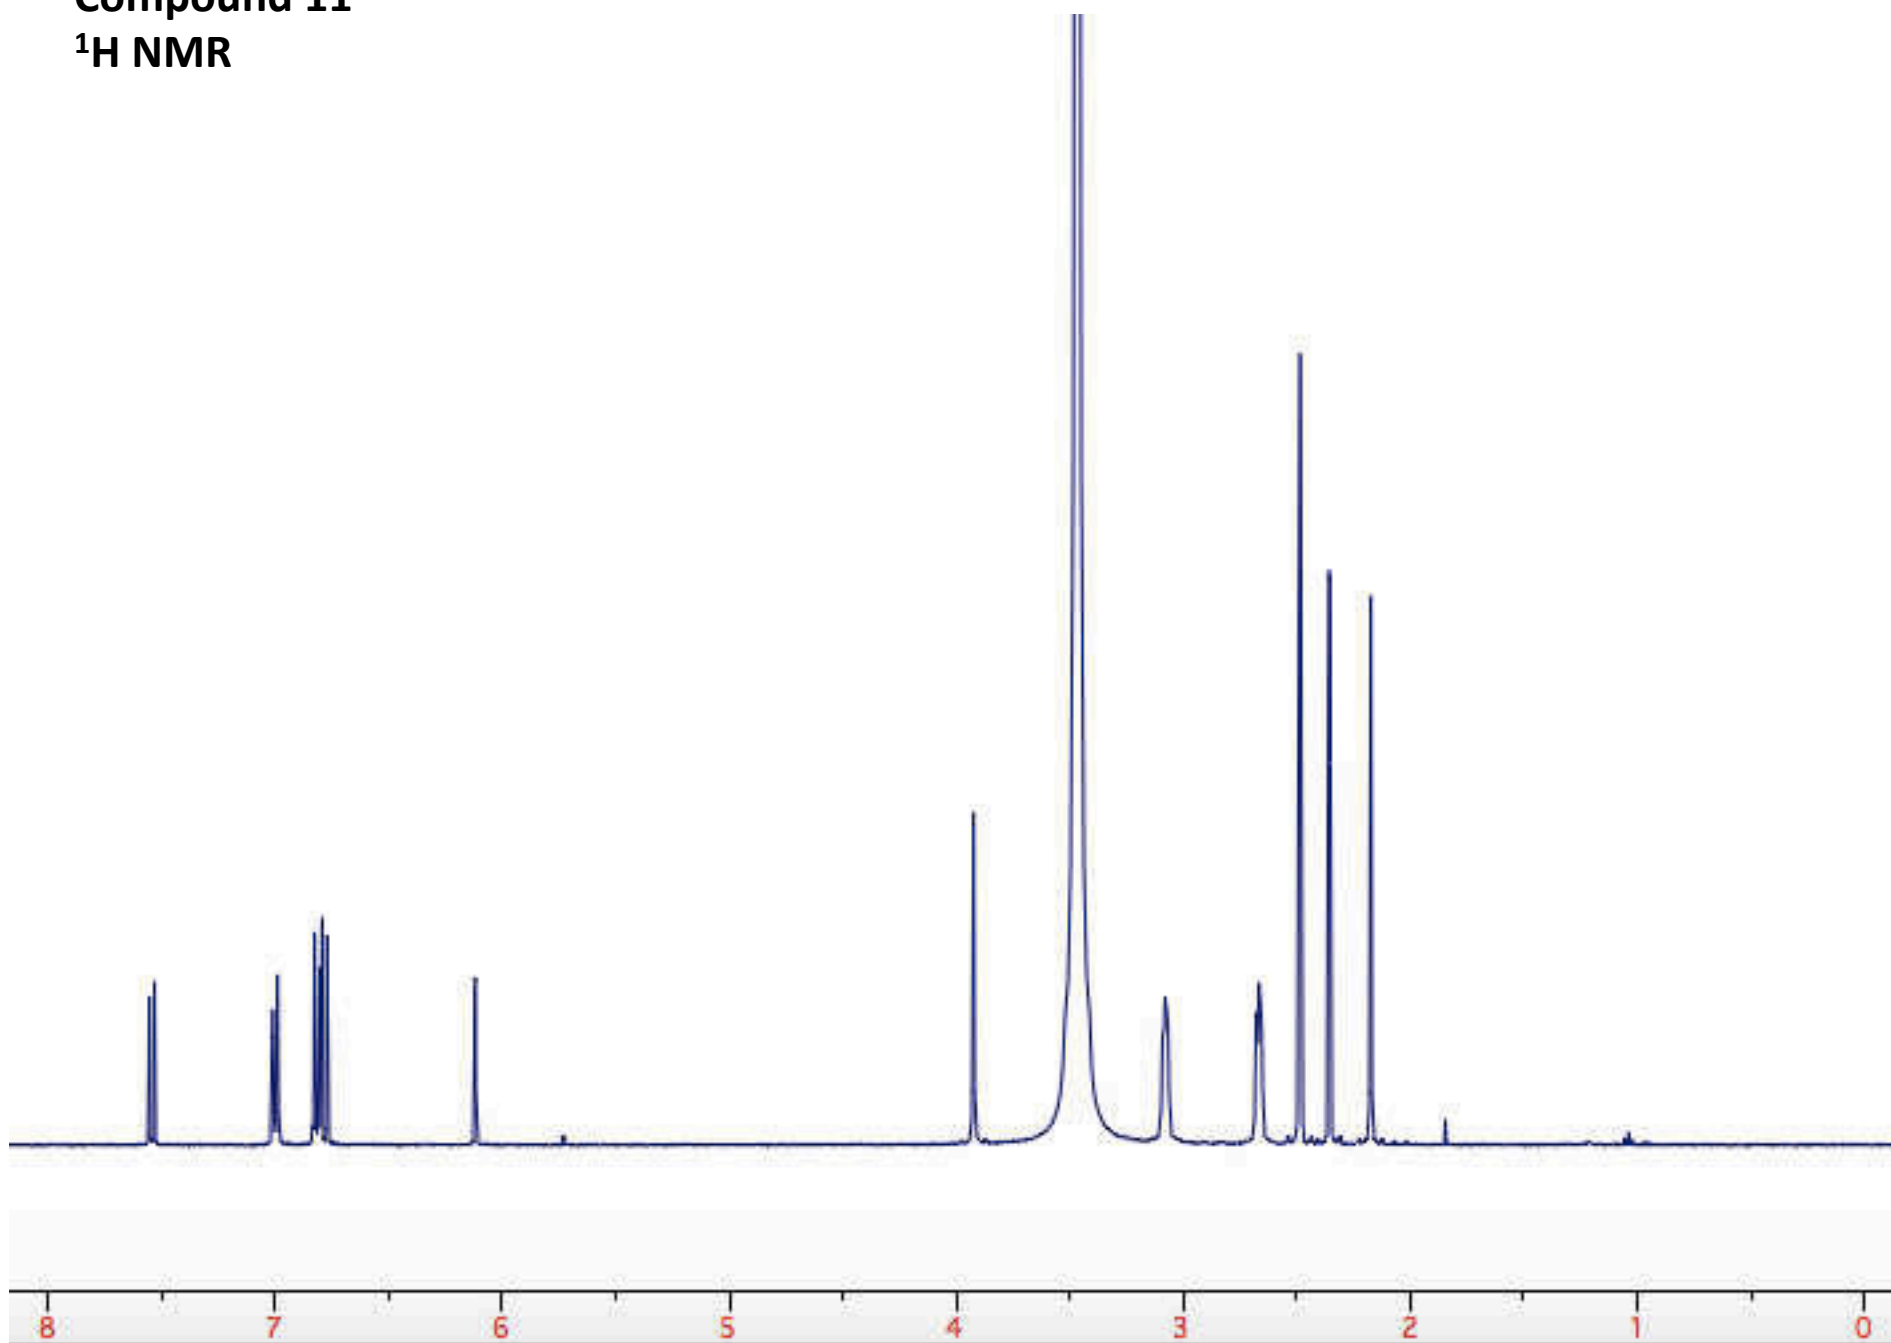



# Compound 11

## <sup>13</sup>C NMR

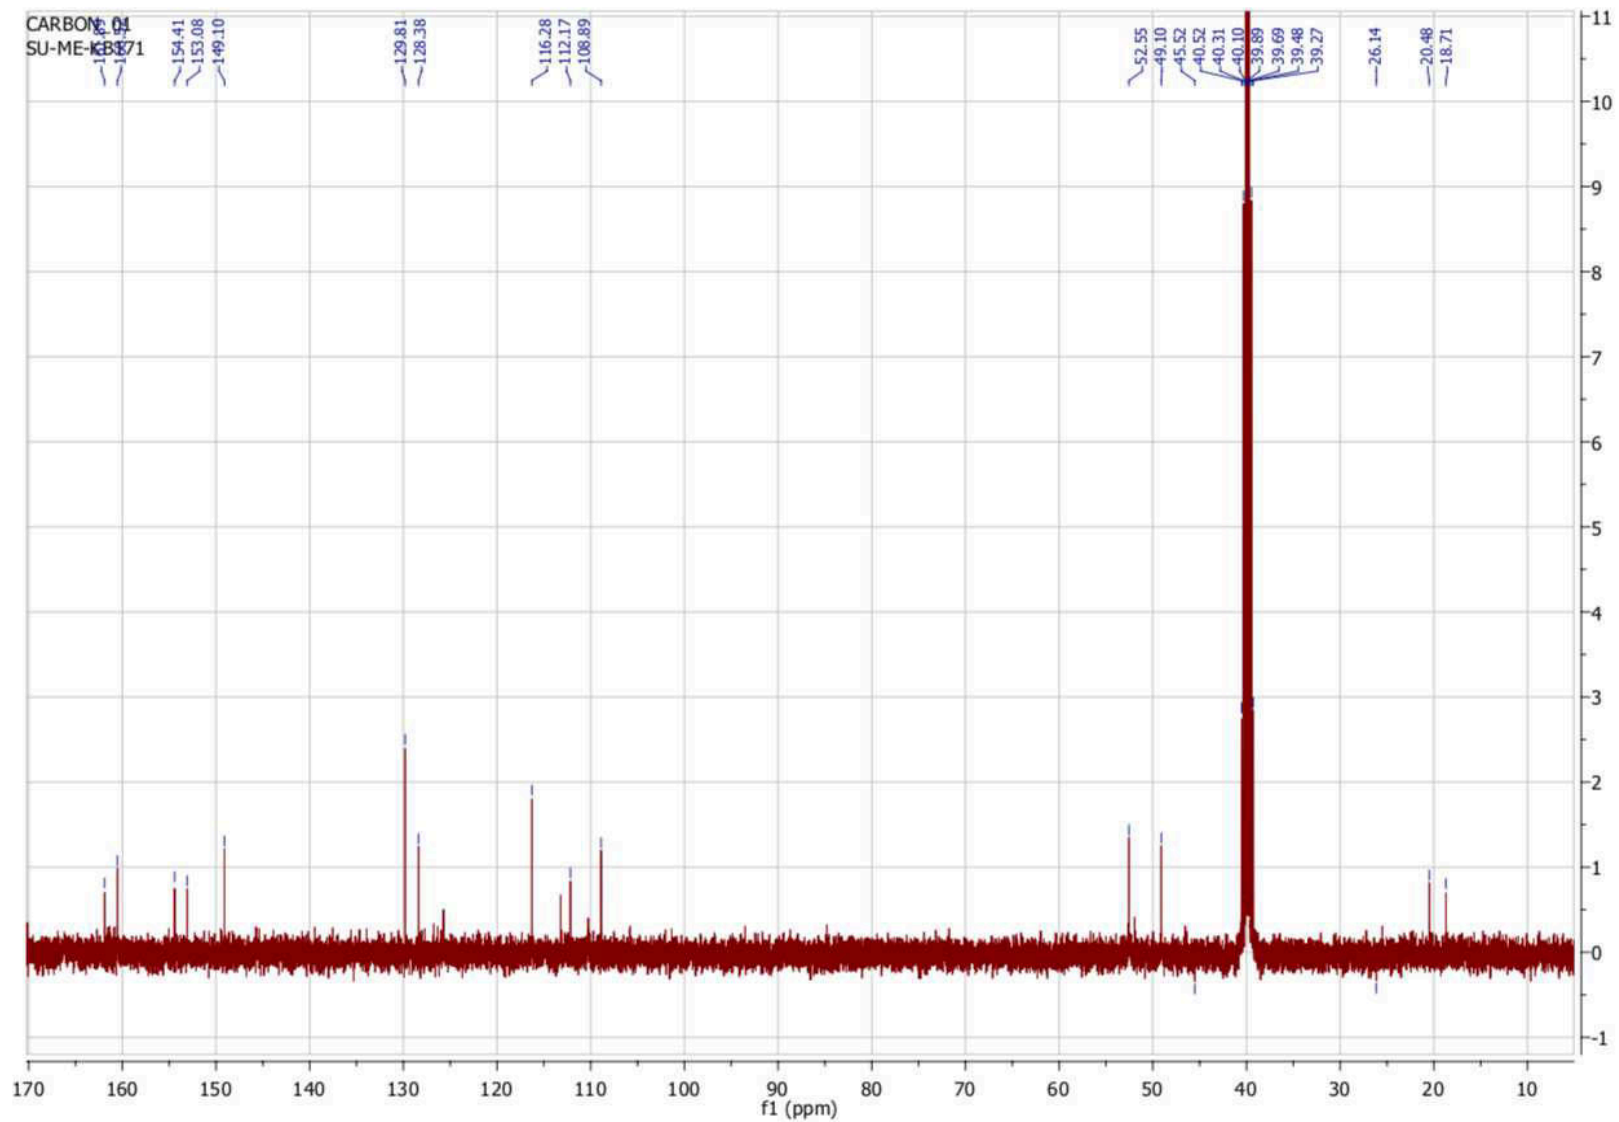

**Compound 12**  
 **$^1\text{H}$  NMR**

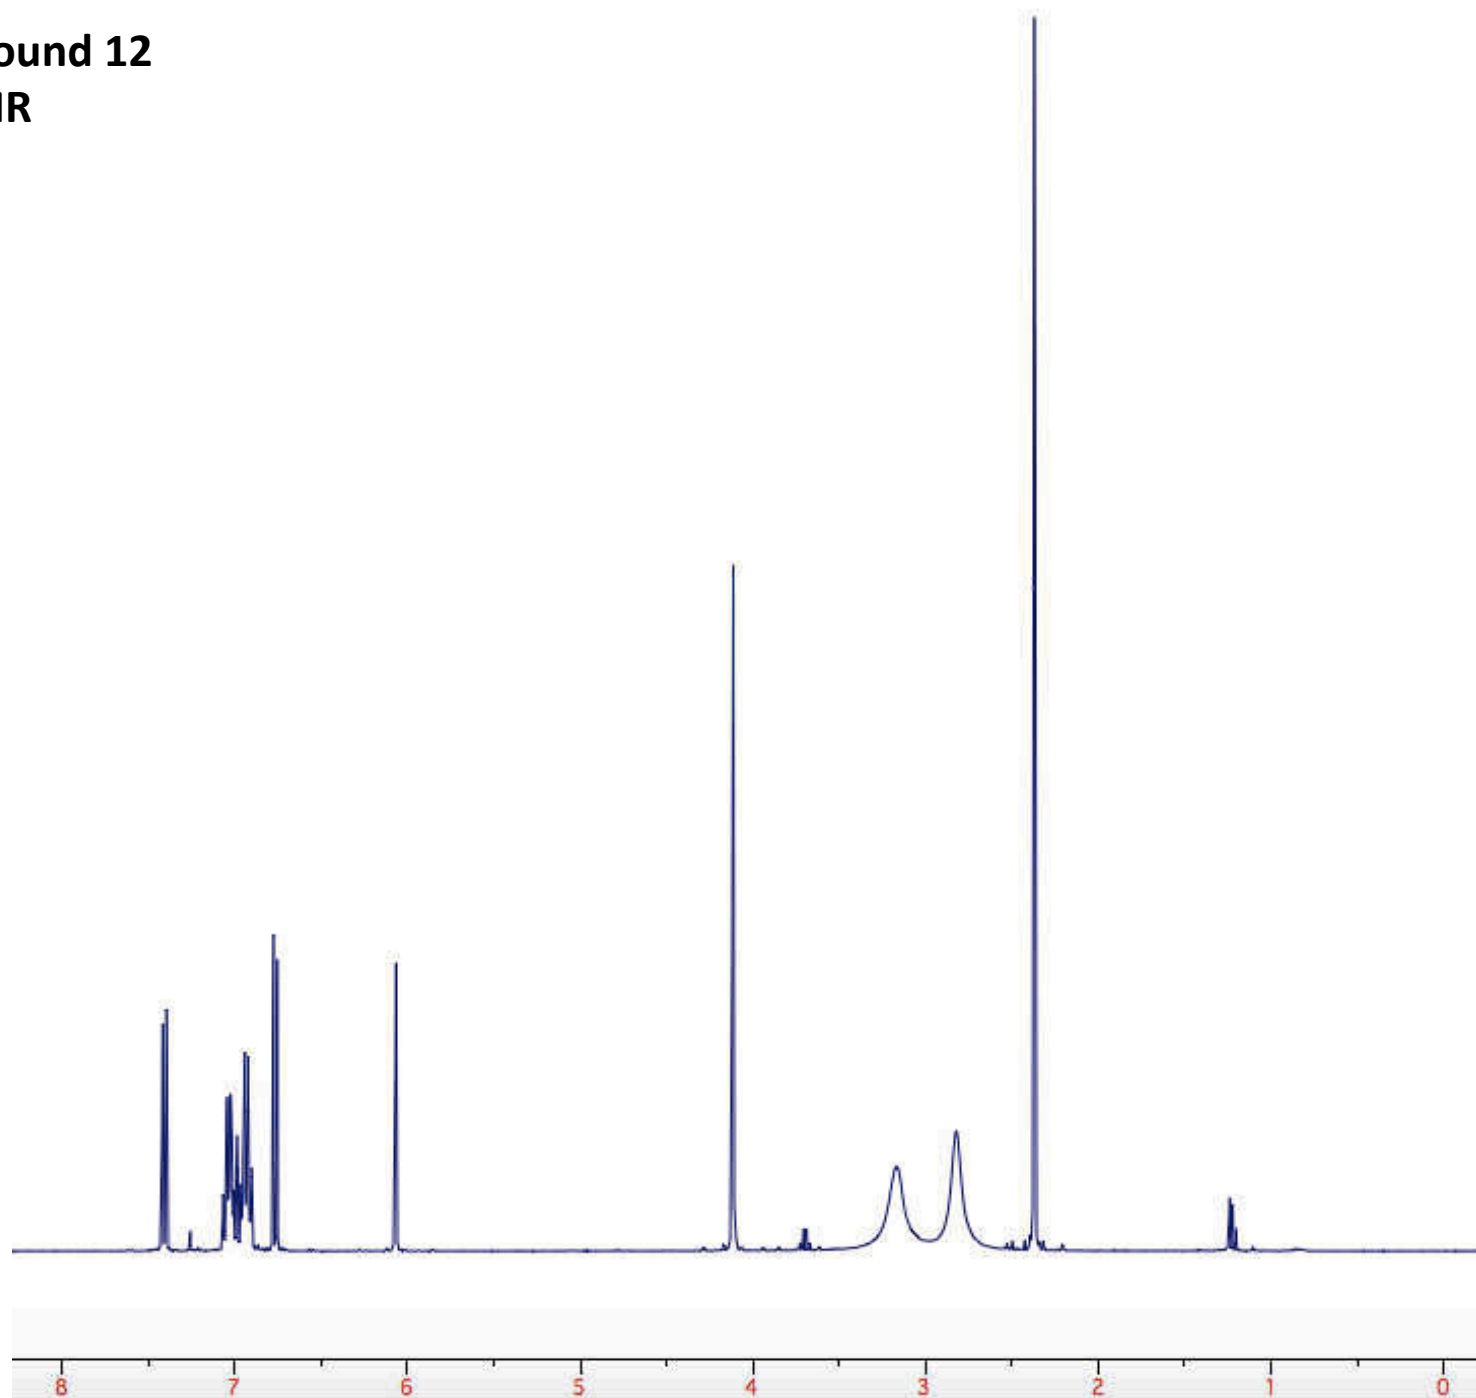

# Compound 12

## <sup>13</sup>C NMR

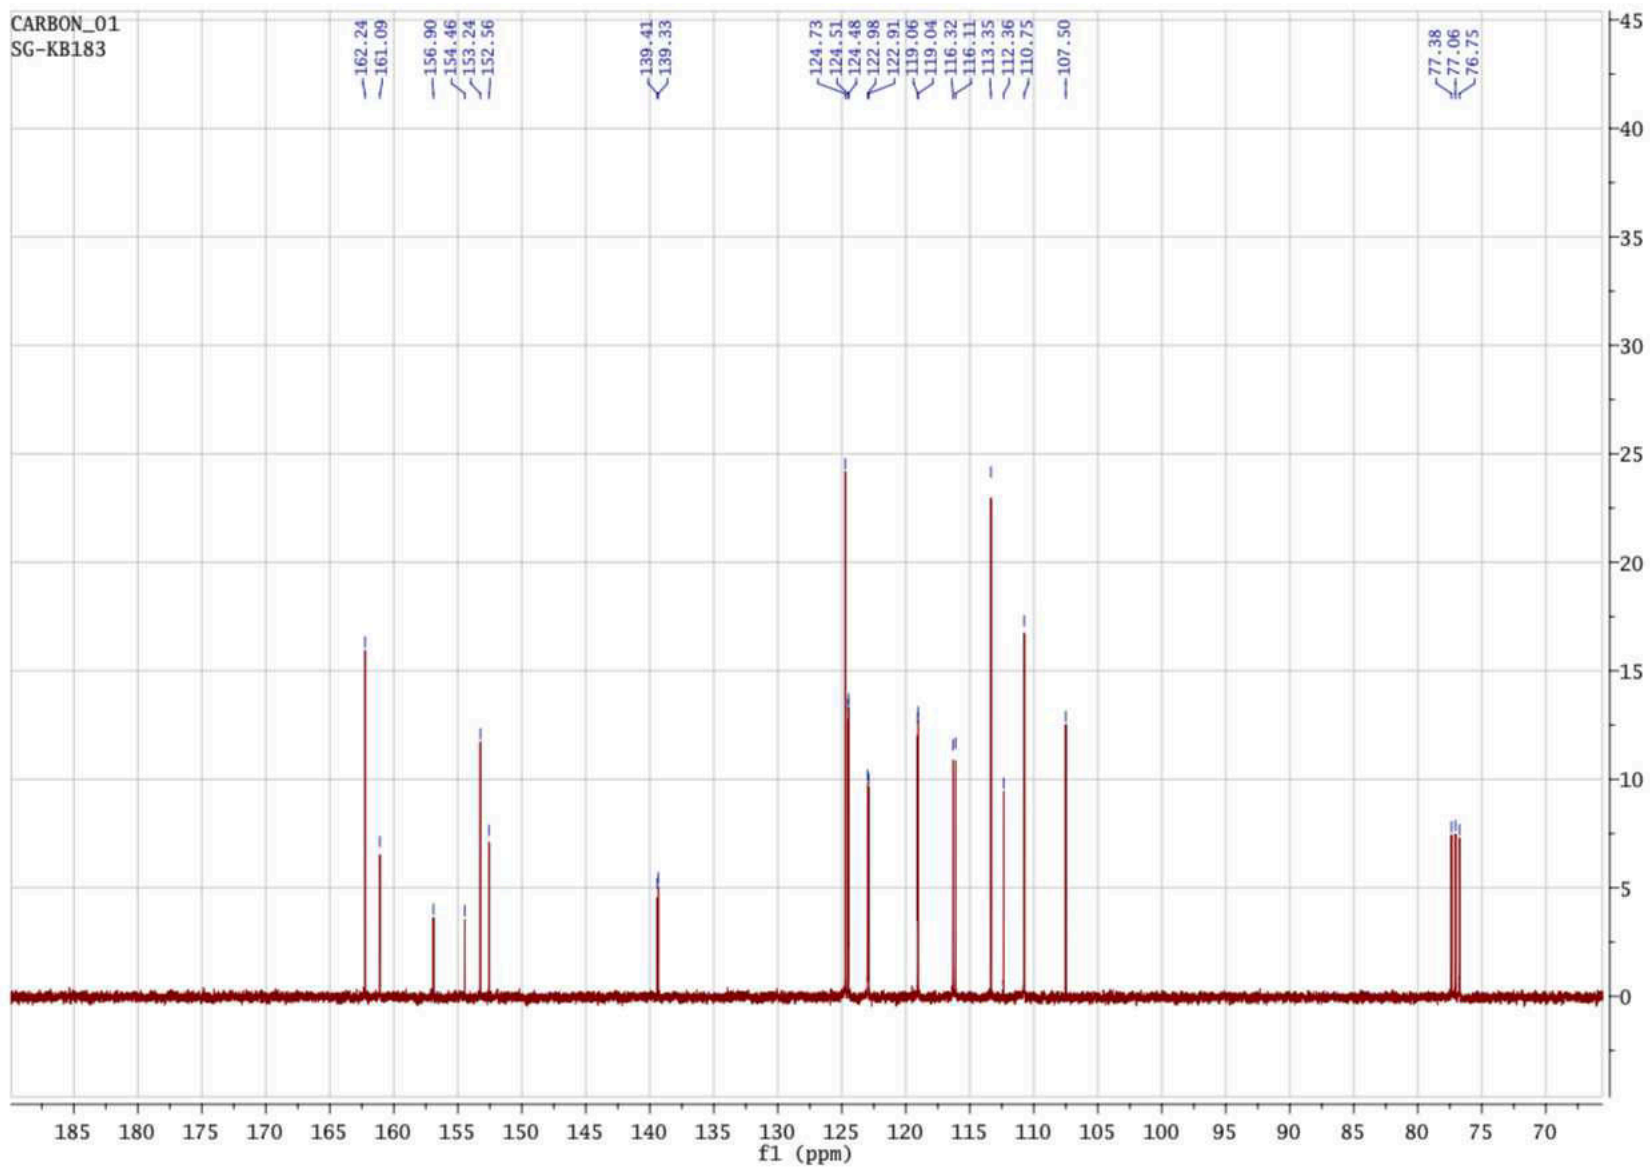

Compound 13

$^1\text{H}$  NMR

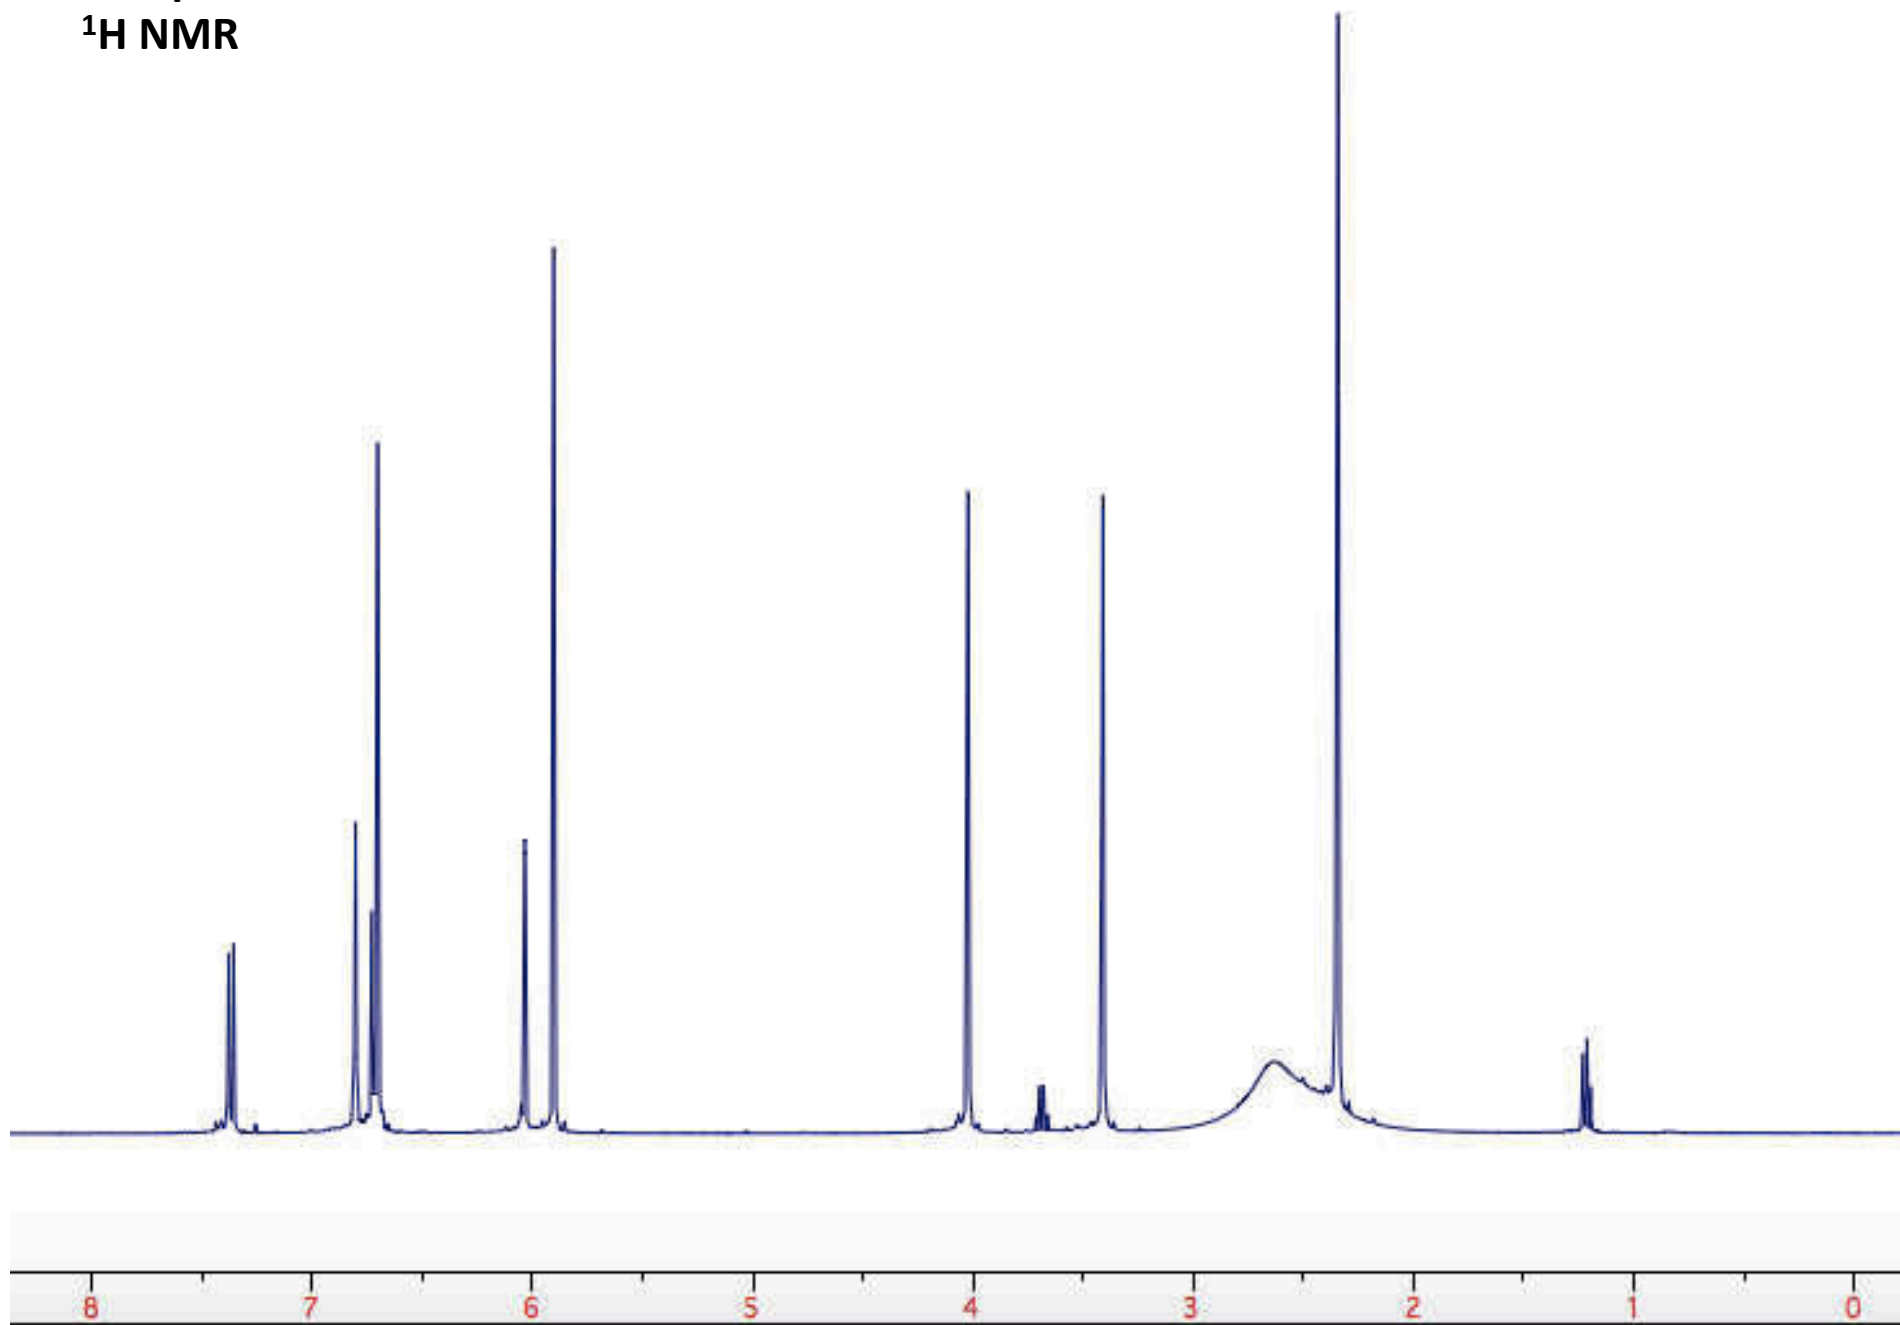

# Compound 13

## <sup>13</sup>C NMR

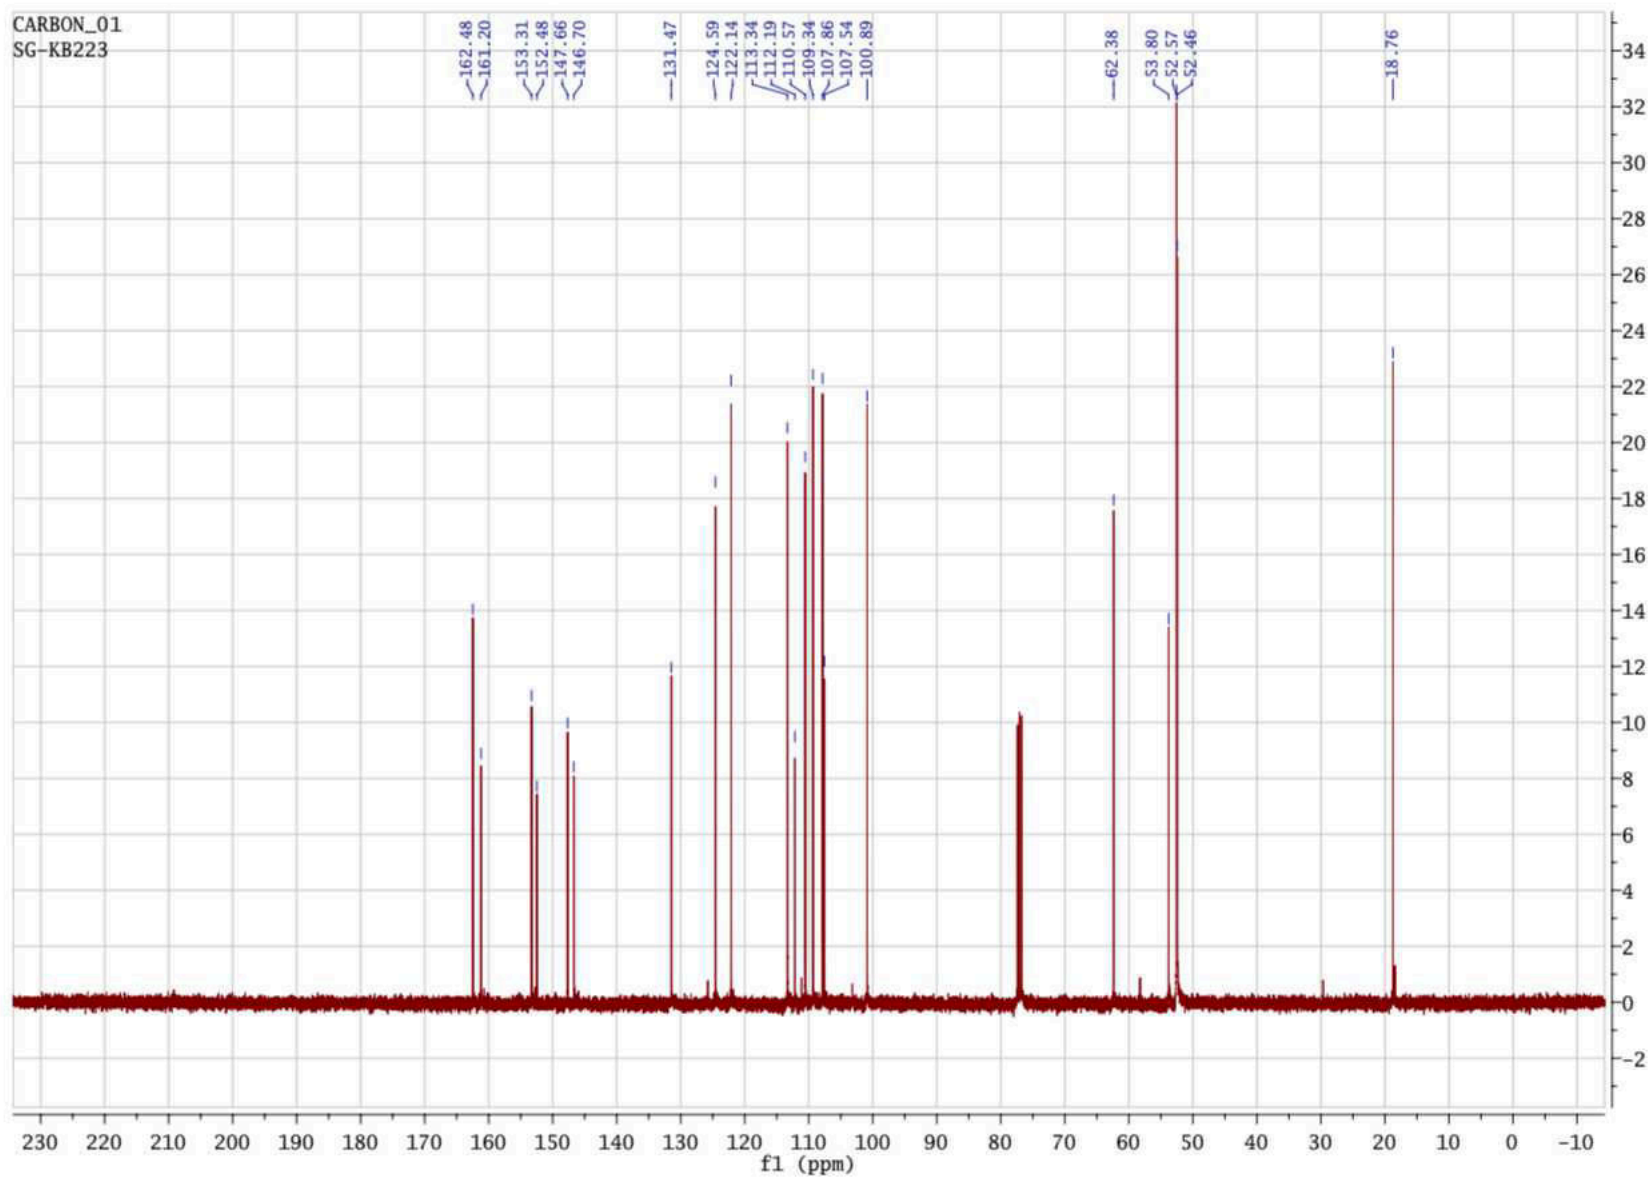

Supplement: ijms-20-01208-s001.pdf [file ijms-20-01208-s001.pdf]
